# Supplementary material for: Synthesis and biological activity of cyclopropyl Δ7-dafachronic acids as DAF-12 receptor ligands
Source: Royal Society of Chemistry journal article supplement (doi:10.1039/d1ob00912e), 2021-01-01
Supplement: d1ob00912e1.pdf [file d1ob00912e1.pdf]

## Supplementary Information

### Synthesis and Biological Activity of Cyclopropyl $\Delta^7$ -Dafachronic Acids as DAF-12 Receptor Ligands

*Valentina Mancino,<sup>a,b</sup> Giada Ceccarelli,<sup>a</sup> Andrea Carotti,<sup>a</sup> Laura Goracci,<sup>c</sup> Roccaldo Sardella,<sup>a</sup> Daniela Passeri,<sup>b</sup> Roberto Pellicciari<sup>b</sup> and Antimo Gioiello<sup>\*,a</sup>*

<sup>a</sup>Department of Pharmaceutical Sciences, University of Perugia, Via del Liceo 1, 06123, Perugia, Italy. <sup>b</sup> TES Pharma S.r.l., Corso Vannucci 47, 06121, Perugia, Italy. <sup>c</sup> Department of Chemistry, Biology and Biotechnology, University of Perugia, Via dell'Elce di Sotto 8, 06123, Perugia, Italy.

## Table of contents

|                                                                                                                                      |    |
|--------------------------------------------------------------------------------------------------------------------------------------|----|
| Copy of NMR spectra                                                                                                                  | 2  |
| • 3-keto-24,25-methylen-24-bishomo-5 $\alpha$ -chol-7-en-26-oic acid ( <b>5,6</b> )                                                  | 2  |
| • 3-keto-24,25-methylen-24-bishomo-5 $\alpha$ -chol-7-en-26-oic acid ( <b>7,8</b> )                                                  | 4  |
| • Methyl 3 $\beta$ -acetoxy-chol-5-en-24-oate ( <b>11</b> )                                                                          | 6  |
| • Methyl 3 $\beta$ -acetoxy-7-keto-chol-5-en-24-oate ( <b>12</b> )                                                                   | 8  |
| • Methyl 3 $\beta$ -acetoxy-7-keto-5 $\alpha$ -cholan-24-oate ( <b>13</b> )                                                          | 10 |
| • Methyl 3 $\beta$ -acetoxy-7 $\alpha$ -hydroxy-5 $\alpha$ -cholan-24-oate ( <b>14</b> )                                             | 12 |
| • 3 $\beta$ ,7 $\alpha$ -ditetrahydropyranyloxy-24-homo-5 $\alpha$ -chol-24-ene ( <b>19</b> )                                        | 14 |
| • Methyl 3 $\beta$ ,7 $\alpha$ -dihydroxy-24,25-methylen-24-bishomo-5 $\alpha$ -cholan-26-oate ( <b>20a</b> )                        | 15 |
| • Methyl 3 $\beta$ ,7 $\alpha$ -dihydroxy-24,25-methylen-24-bishomo-5 $\alpha$ -cholan-26-oate ( <b>20b</b> )                        | 16 |
| • Methyl 3 $\beta$ -acetoxy-24,25-methylen-24-bishomo-5 $\alpha$ -chol-7-en-26-oate ( <b>22a</b> )                                   | 17 |
| • Methyl 3 $\beta$ -acetoxy-24,25-methylen-24-bishomo-5 $\alpha$ -chol-7-en-26-oate ( <b>22b</b> )                                   | 19 |
| • 3 $\beta$ -hydroxy-24,25-methylen-24-bishomo-5 $\alpha$ -chol-7-en-26-oic acid ( <b>23a</b> )                                      | 21 |
| • 3 $\beta$ -hydroxy-24,25-methylen-24-bishomo-5 $\alpha$ -chol-7-en-26-oic acid ( <b>23b</b> )                                      | 23 |
| <br>                                                                                                                                 |    |
| Fig. 1S. HPLC analysis of 3 $\beta$ ,7 $\alpha$ -dihydroxy-24,25-methylen-24-bishomo-5 $\alpha$ -cholan-26-oic acid ( <b>20a,b</b> ) | 25 |
| <br>                                                                                                                                 |    |
| Copy of HRMS                                                                                                                         | 26 |

3-keto-24,25-methylen-24-bishomo-5 $\alpha$ -chol-7-en-26-oic acid (5, 6)

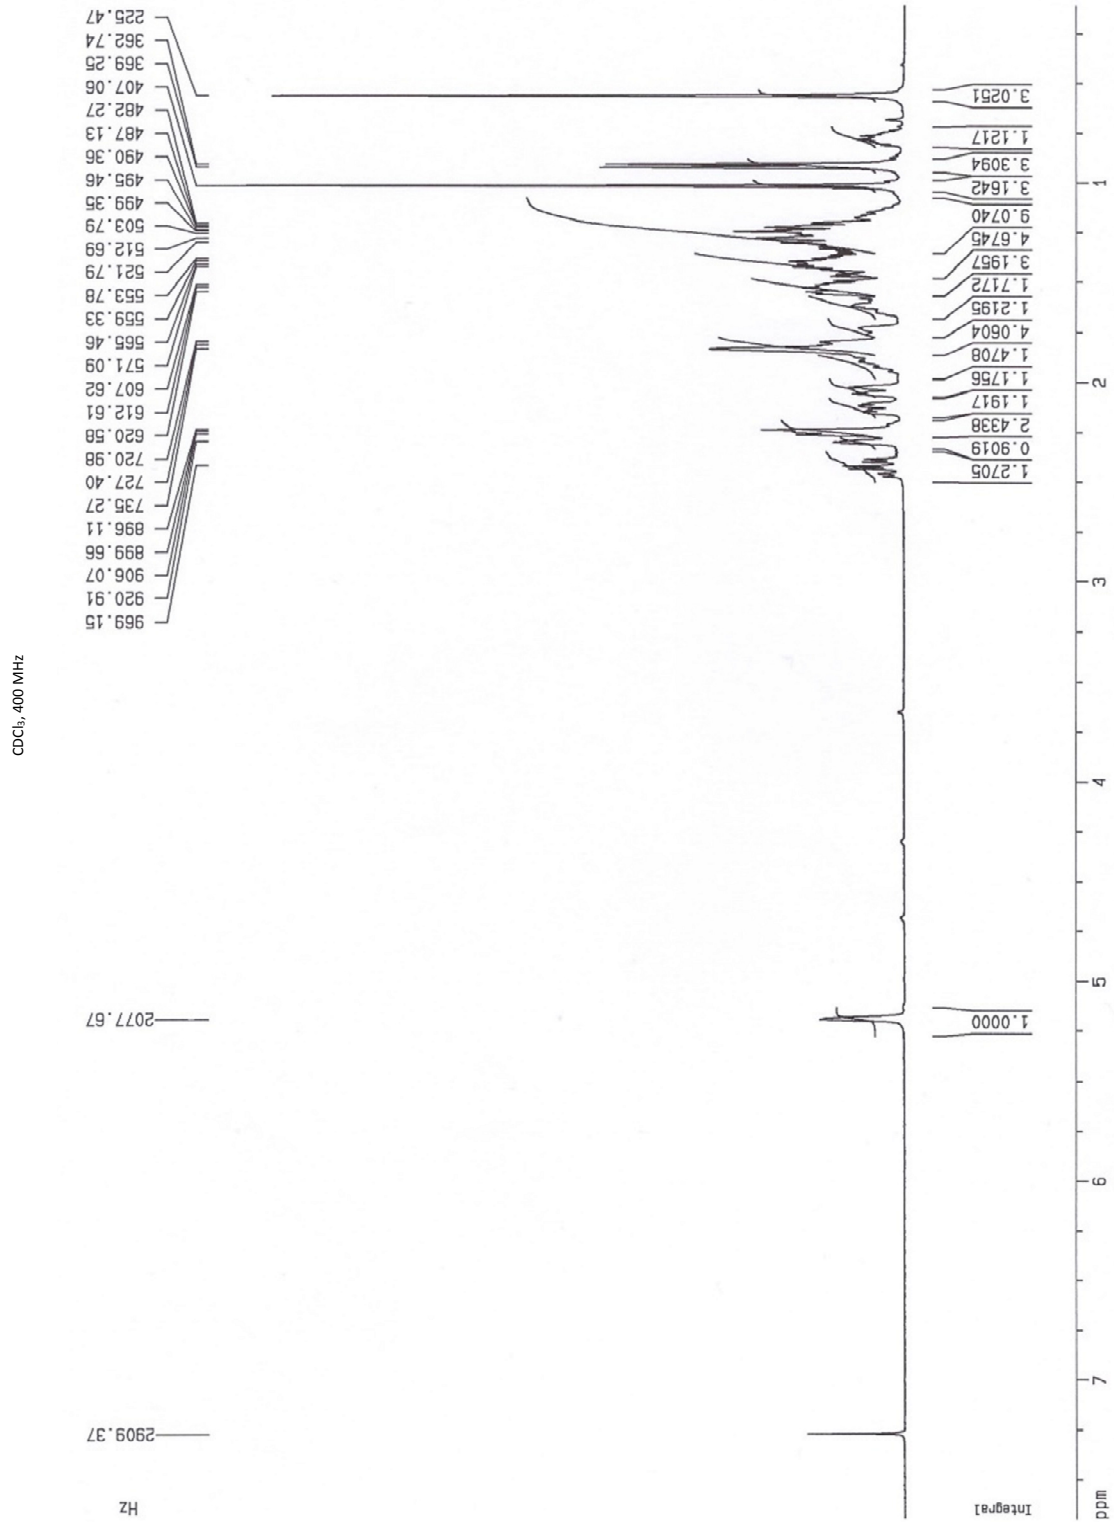

CDCl<sub>3</sub>, 100.6 MHz

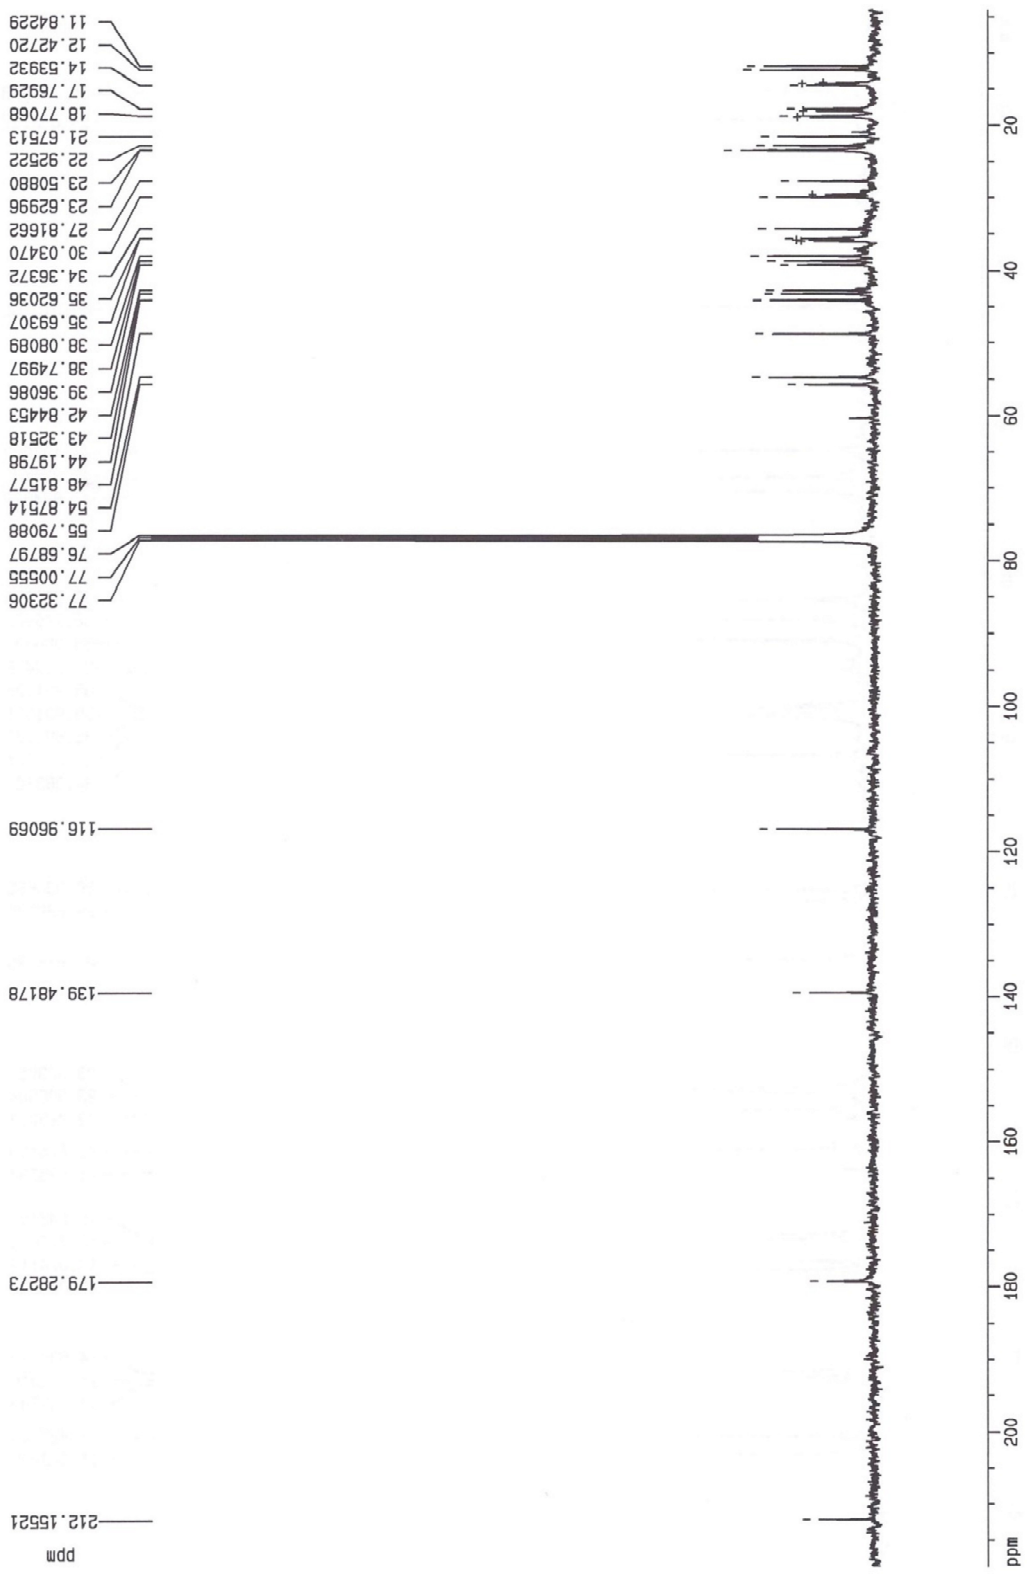

3-keto-24,25-methylen-24-bishomo-5 $\alpha$ -chol-7-en-26-oic acid (7, 8)

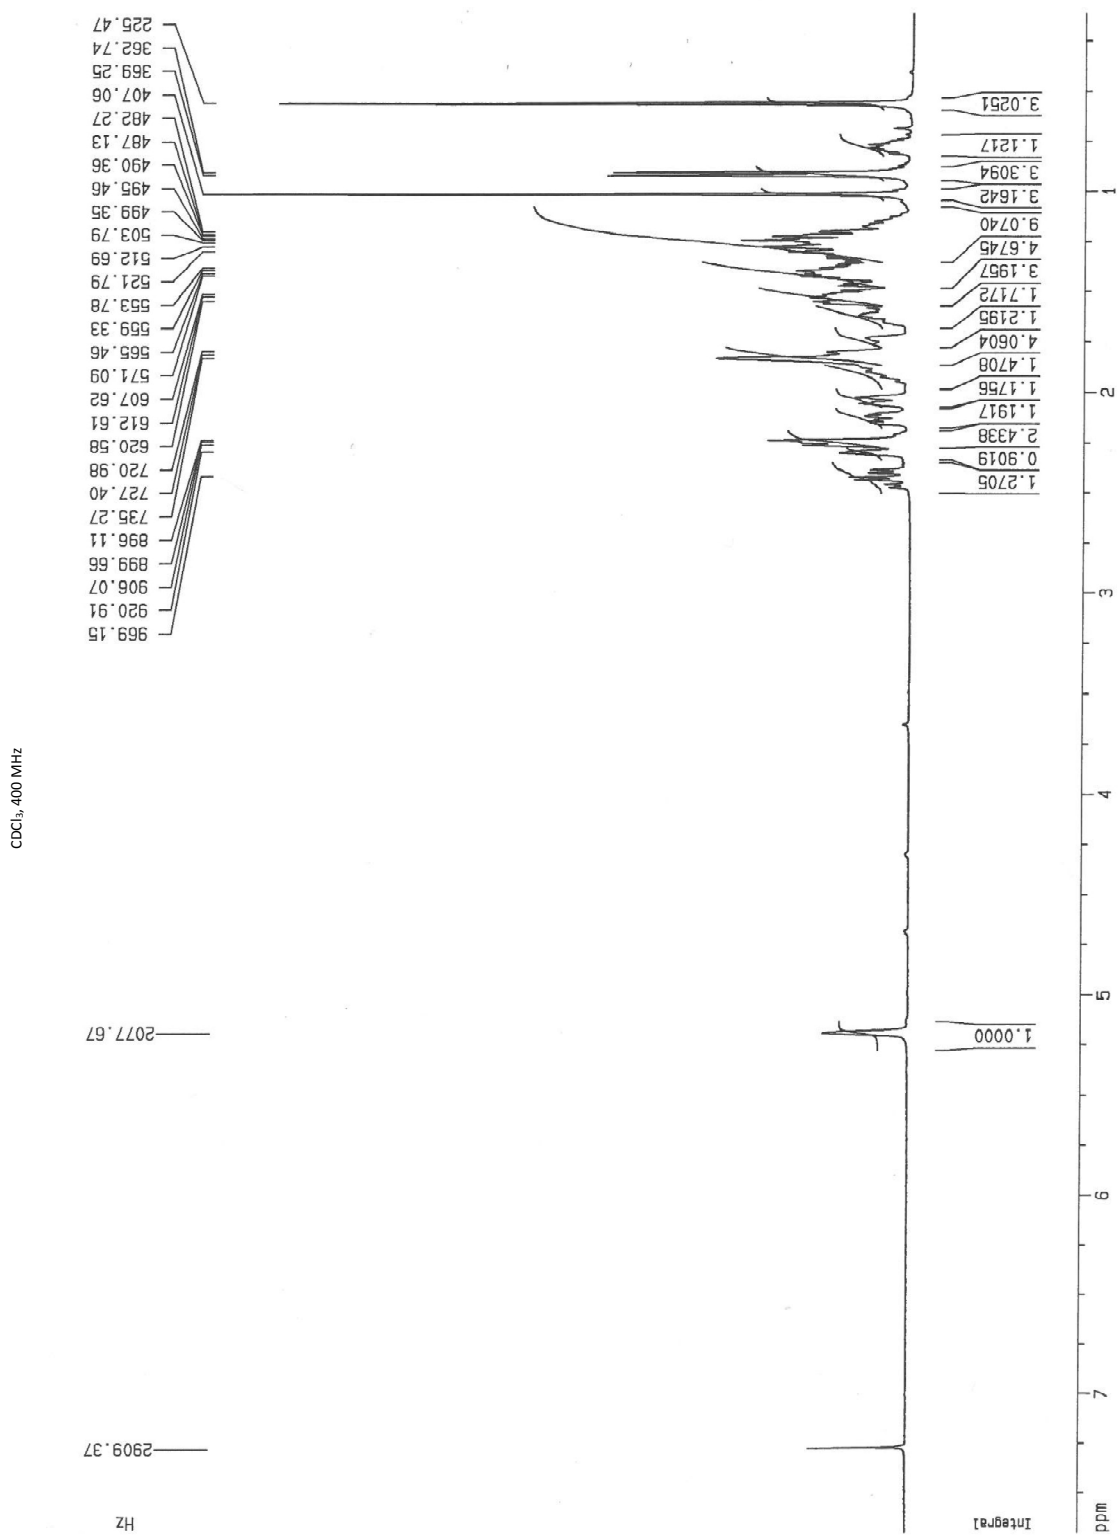

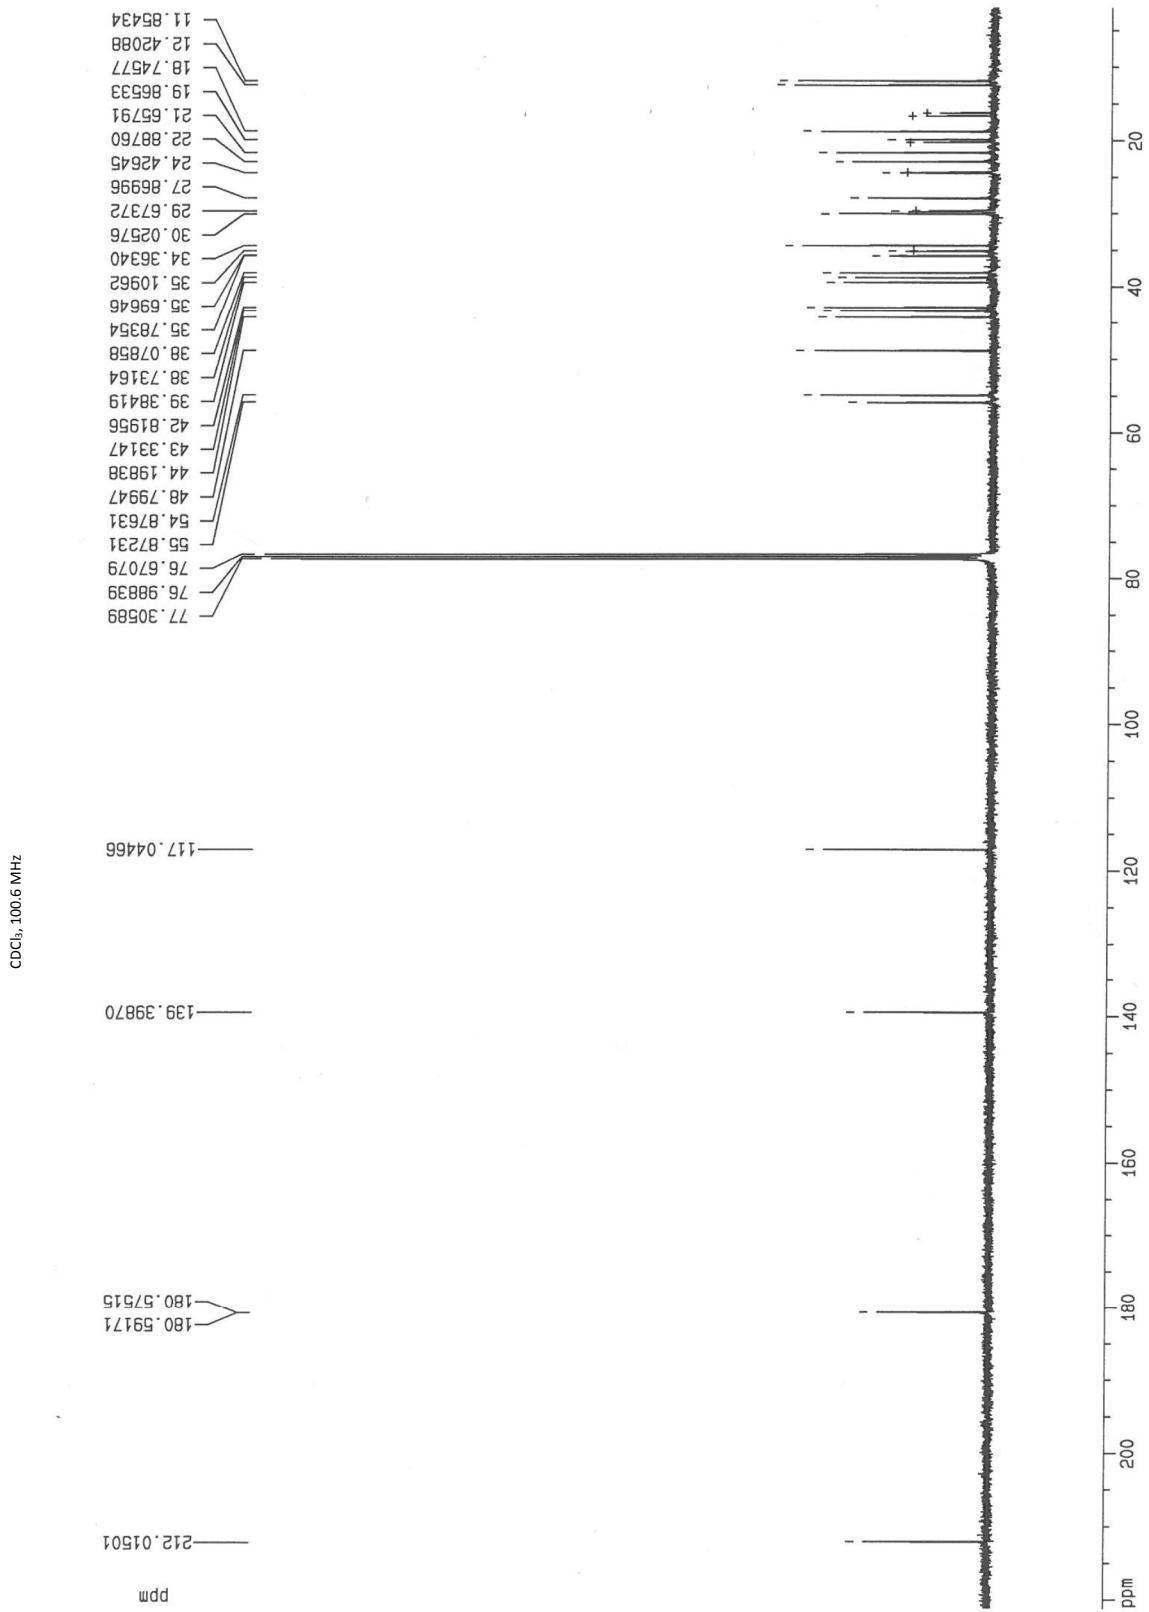

Methyl 3 $\beta$ -acetoxy-chol-5-en-24-oate (11)

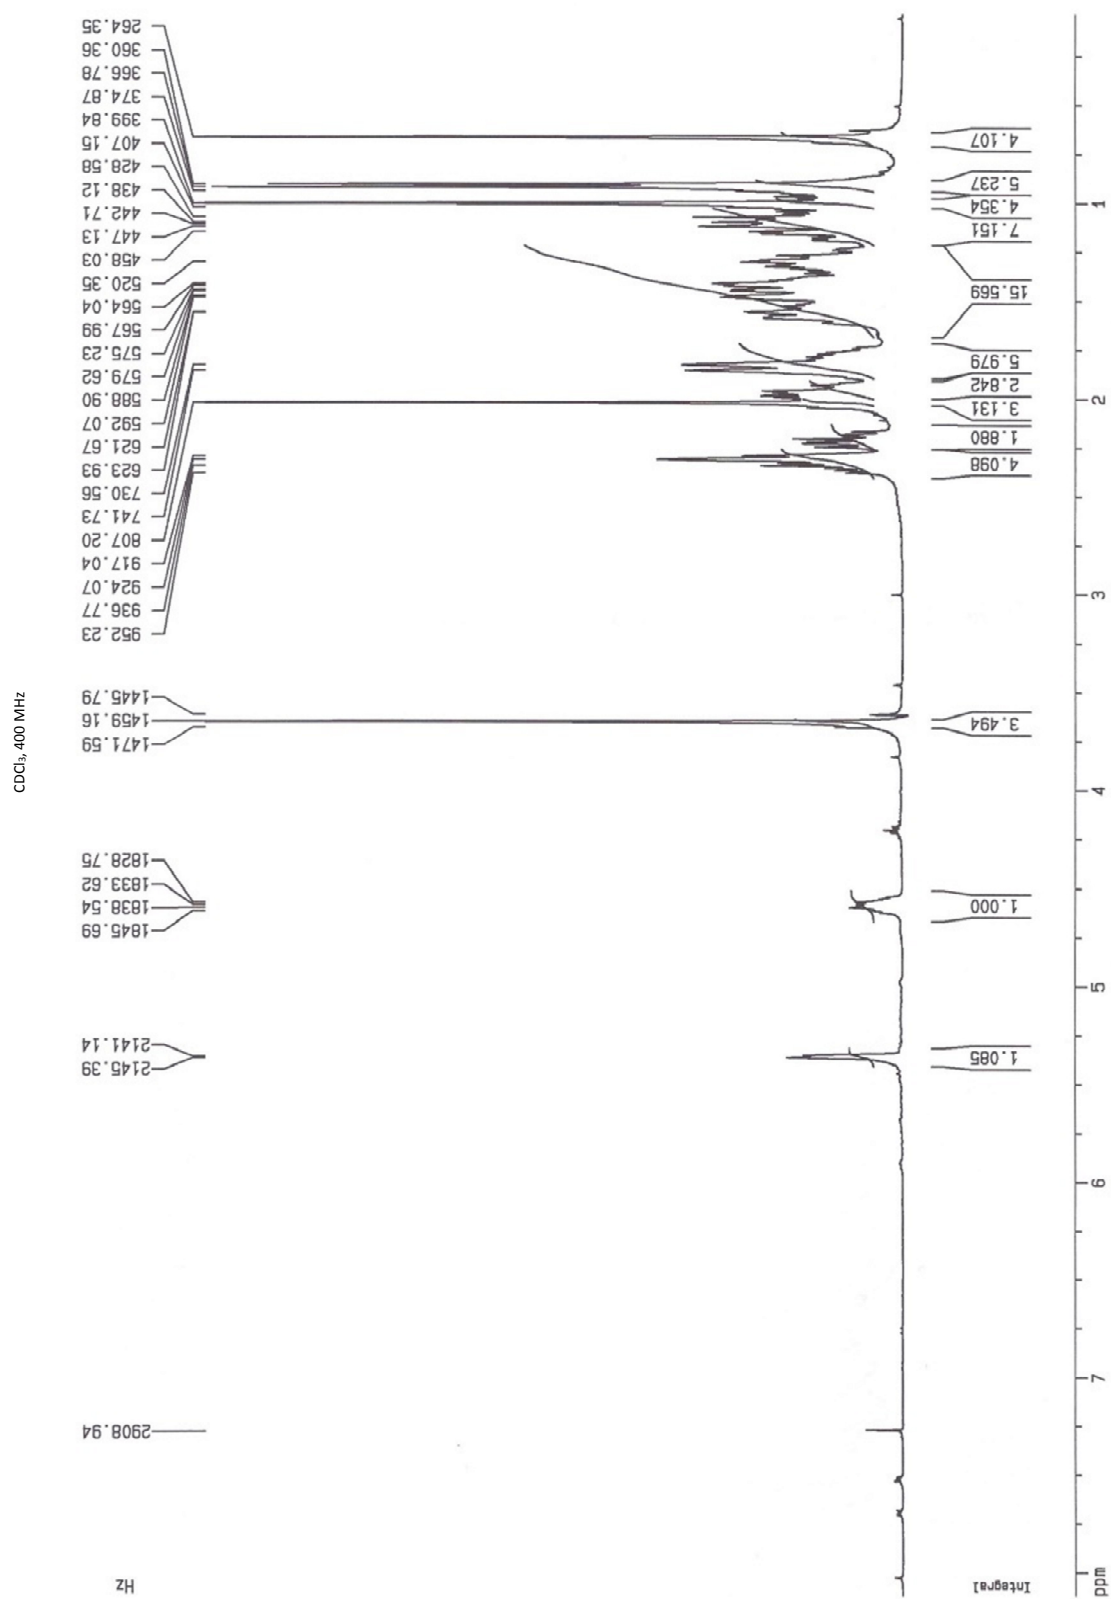

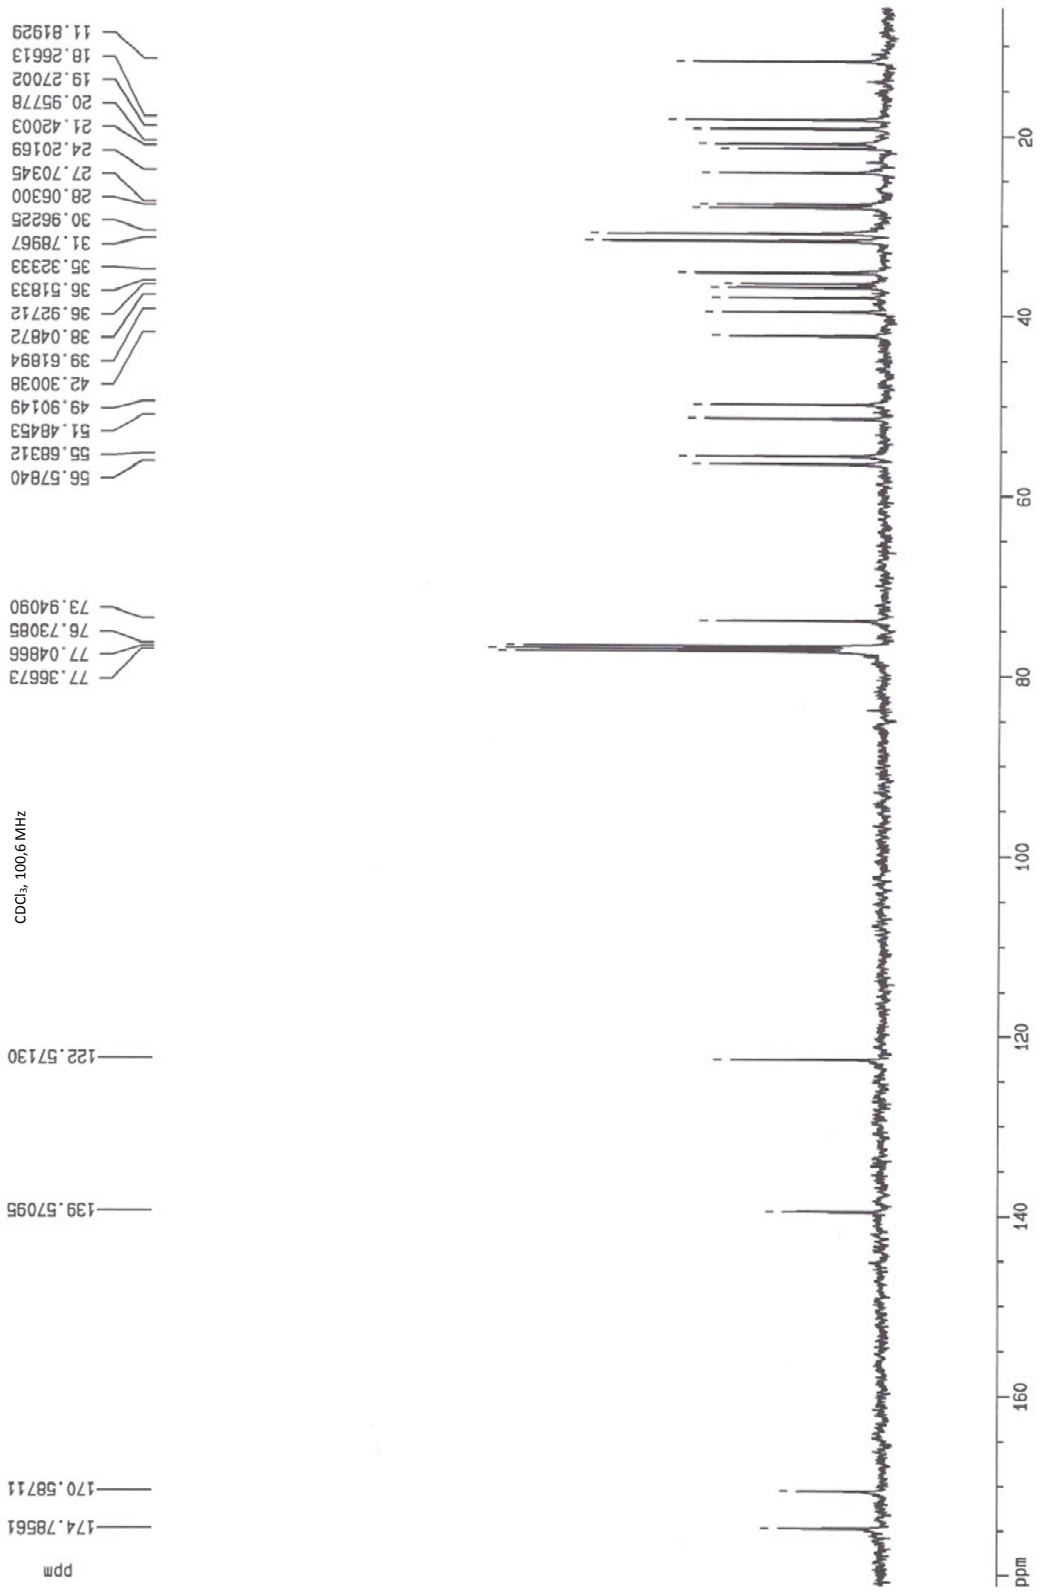



Methyl 3 $\beta$ -acetoxy-7-keto-chol-5-en-24-oate (12)

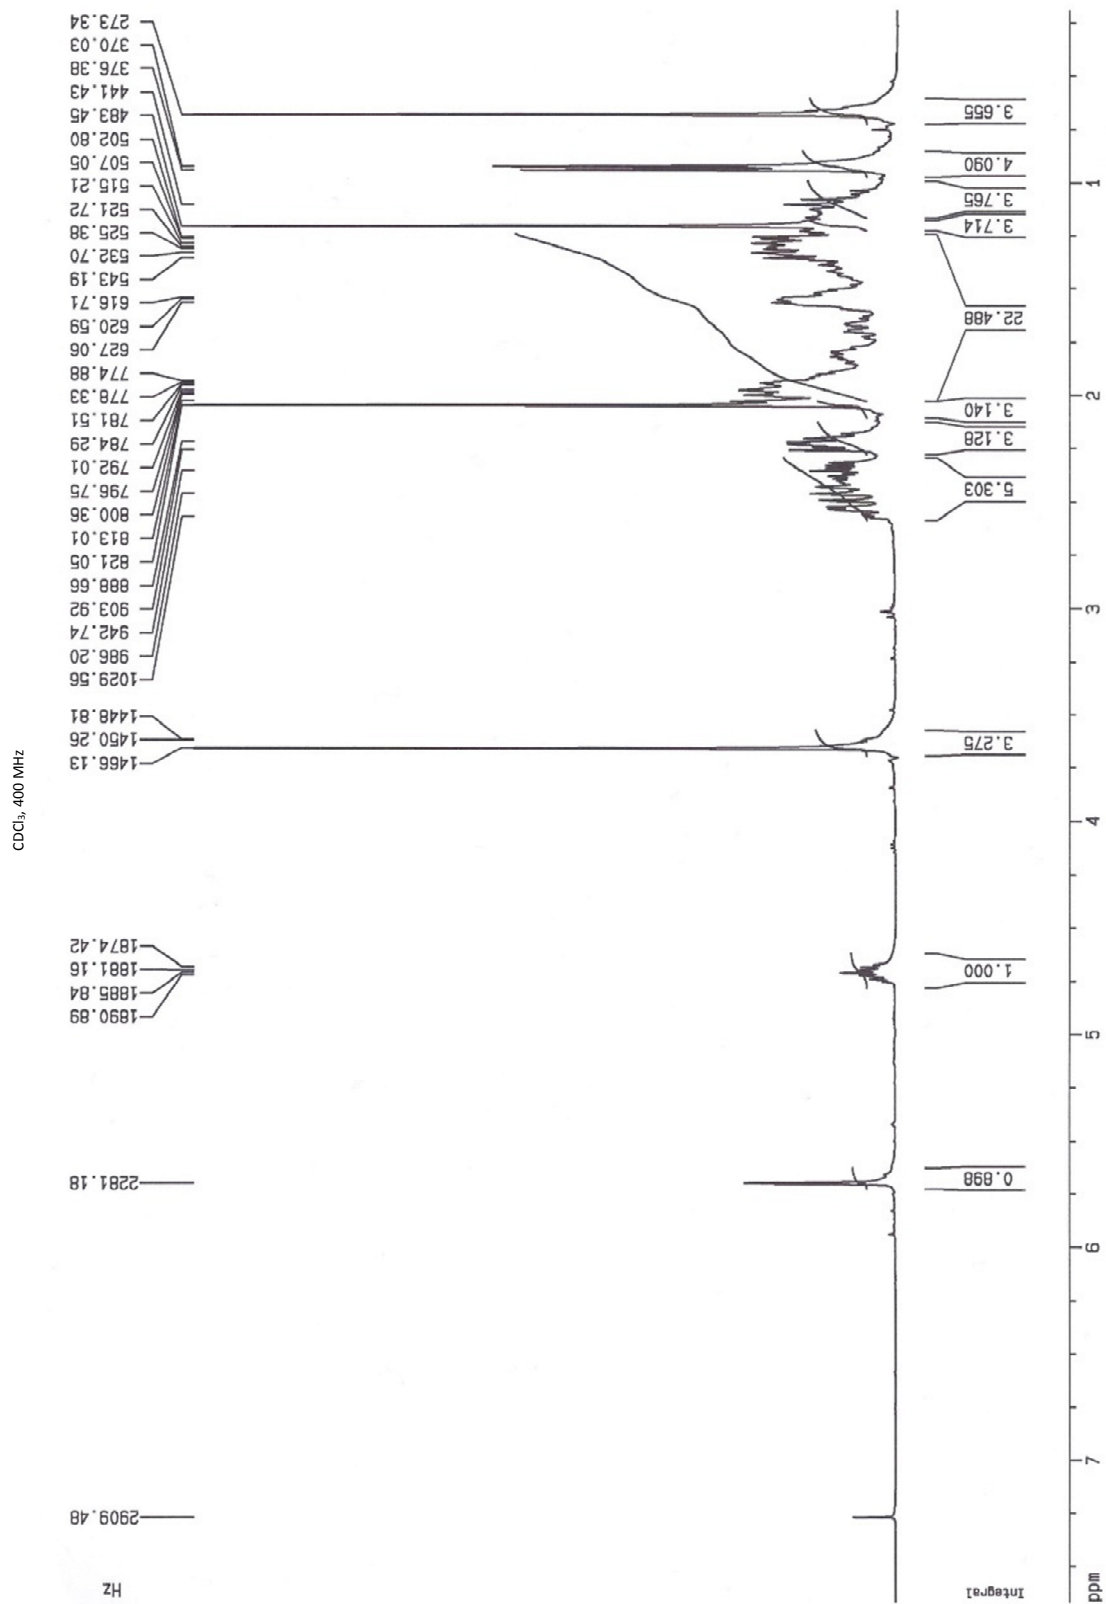

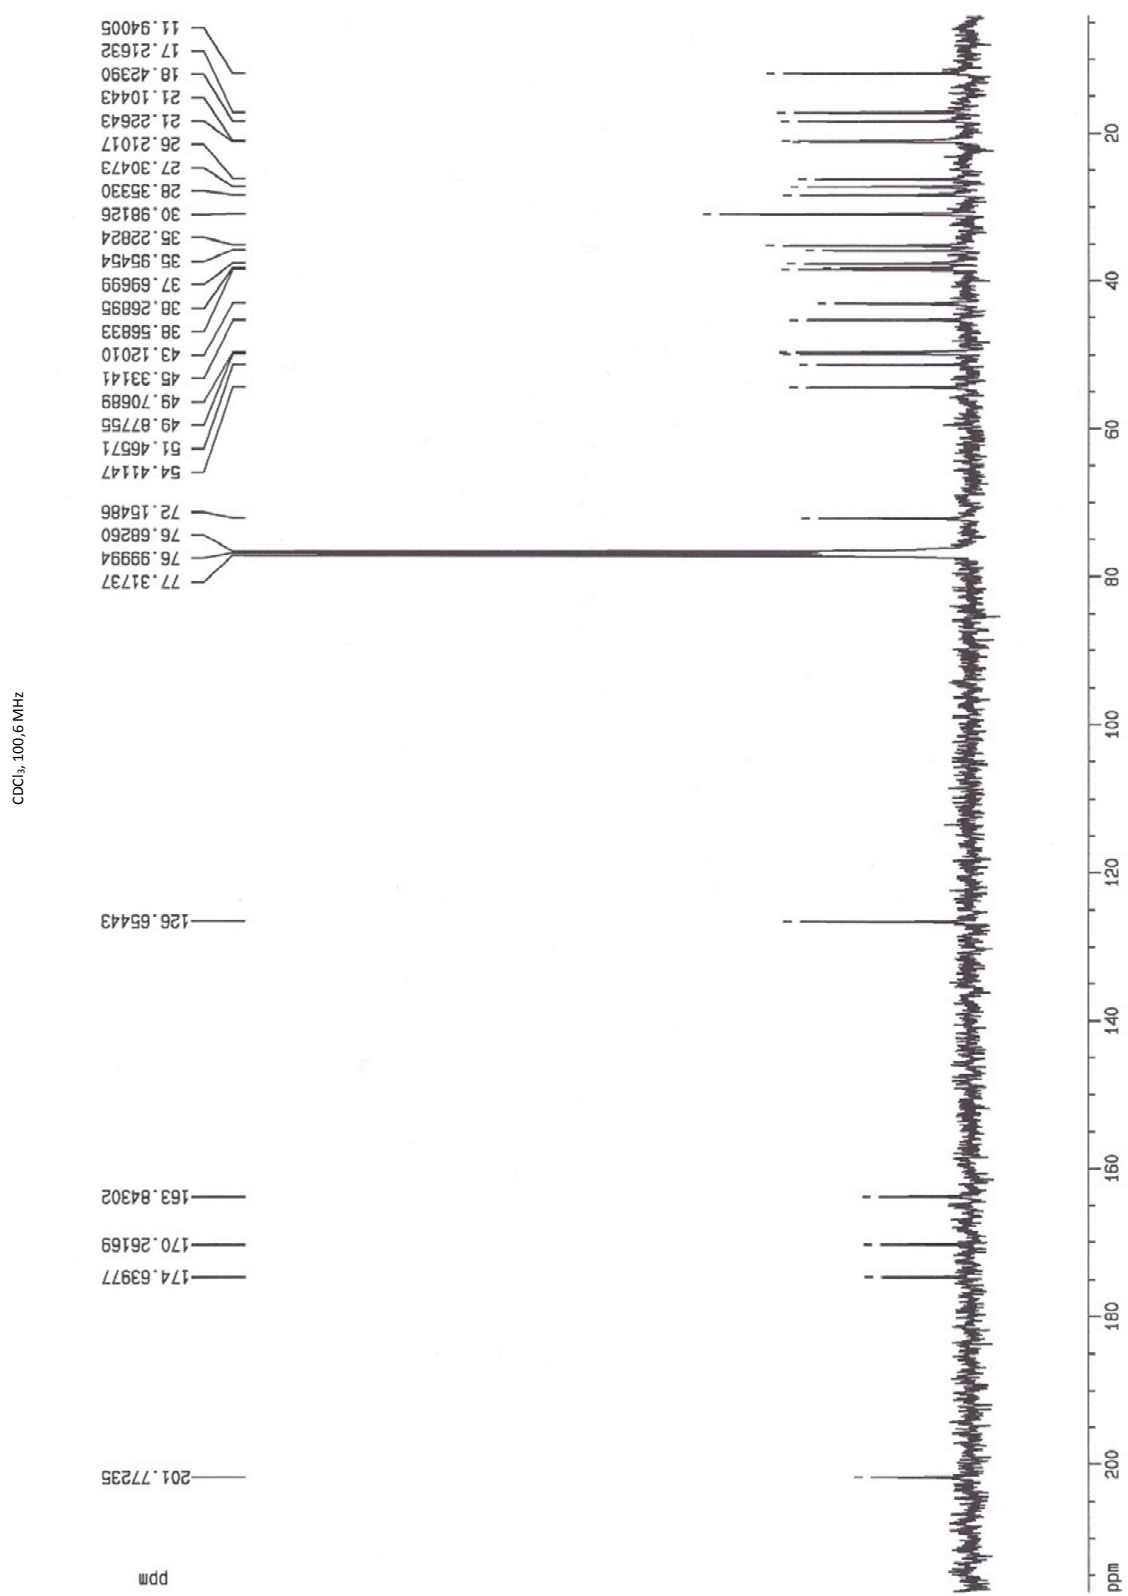

Methyl 3 $\beta$ -acetoxy-7-keto-5 $\alpha$ -cholan-24-oate (13)

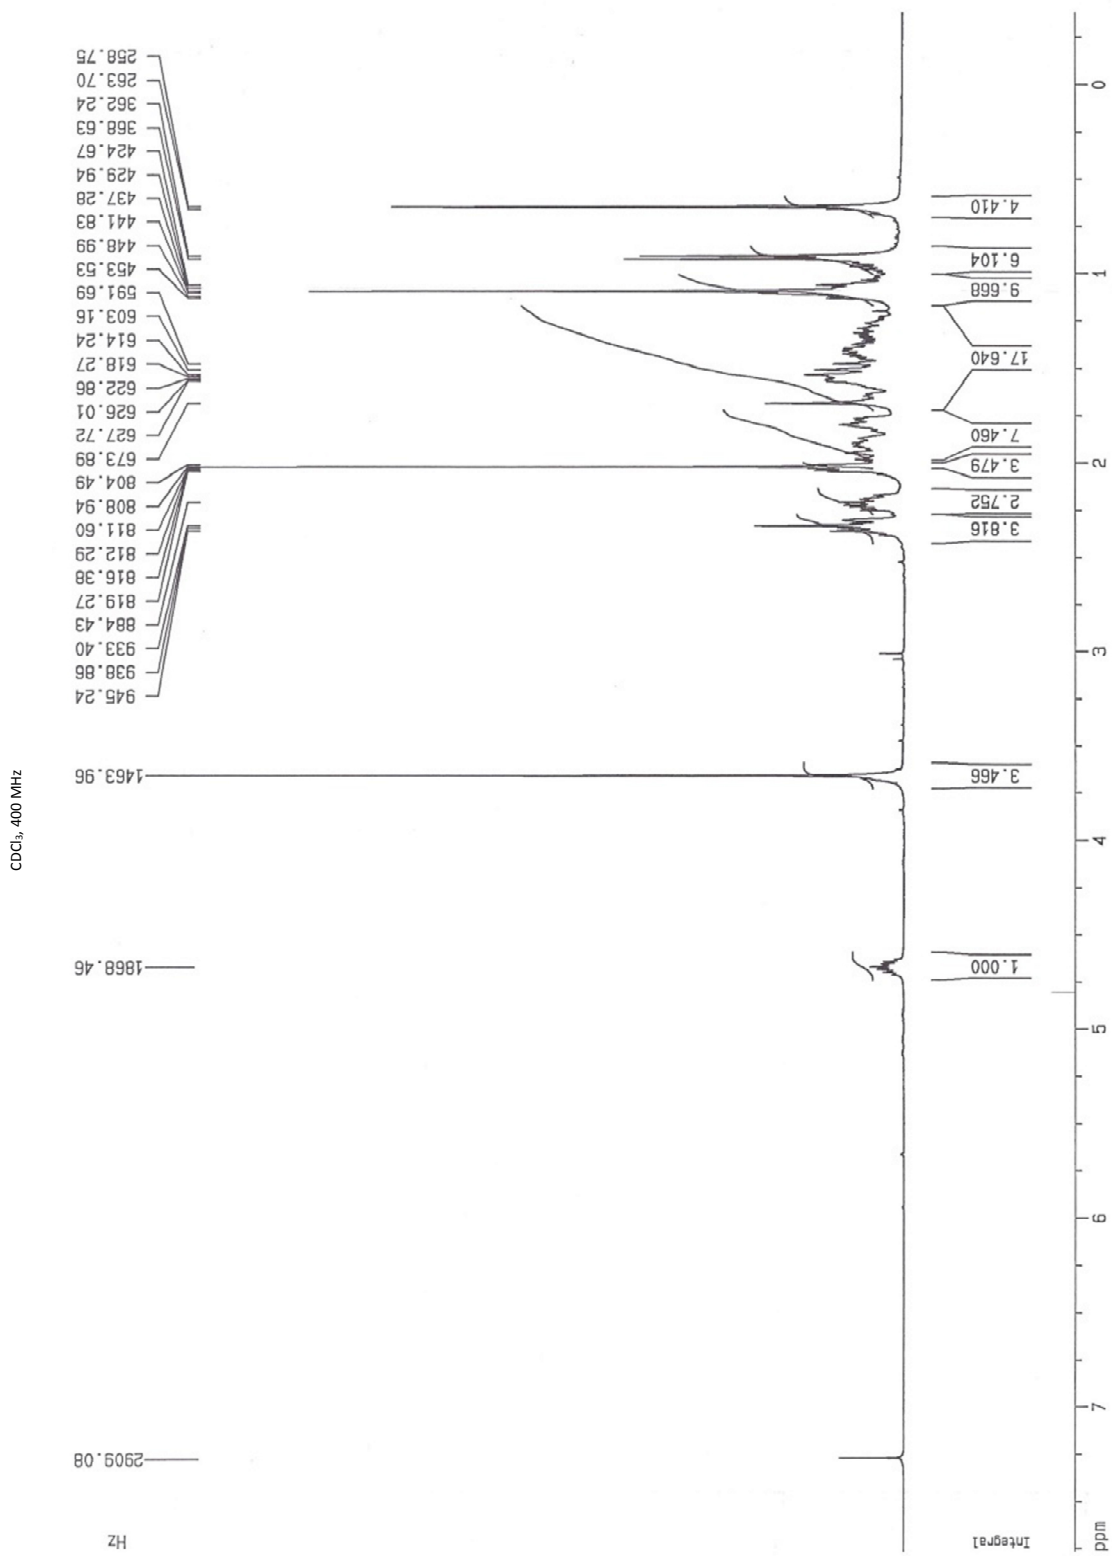

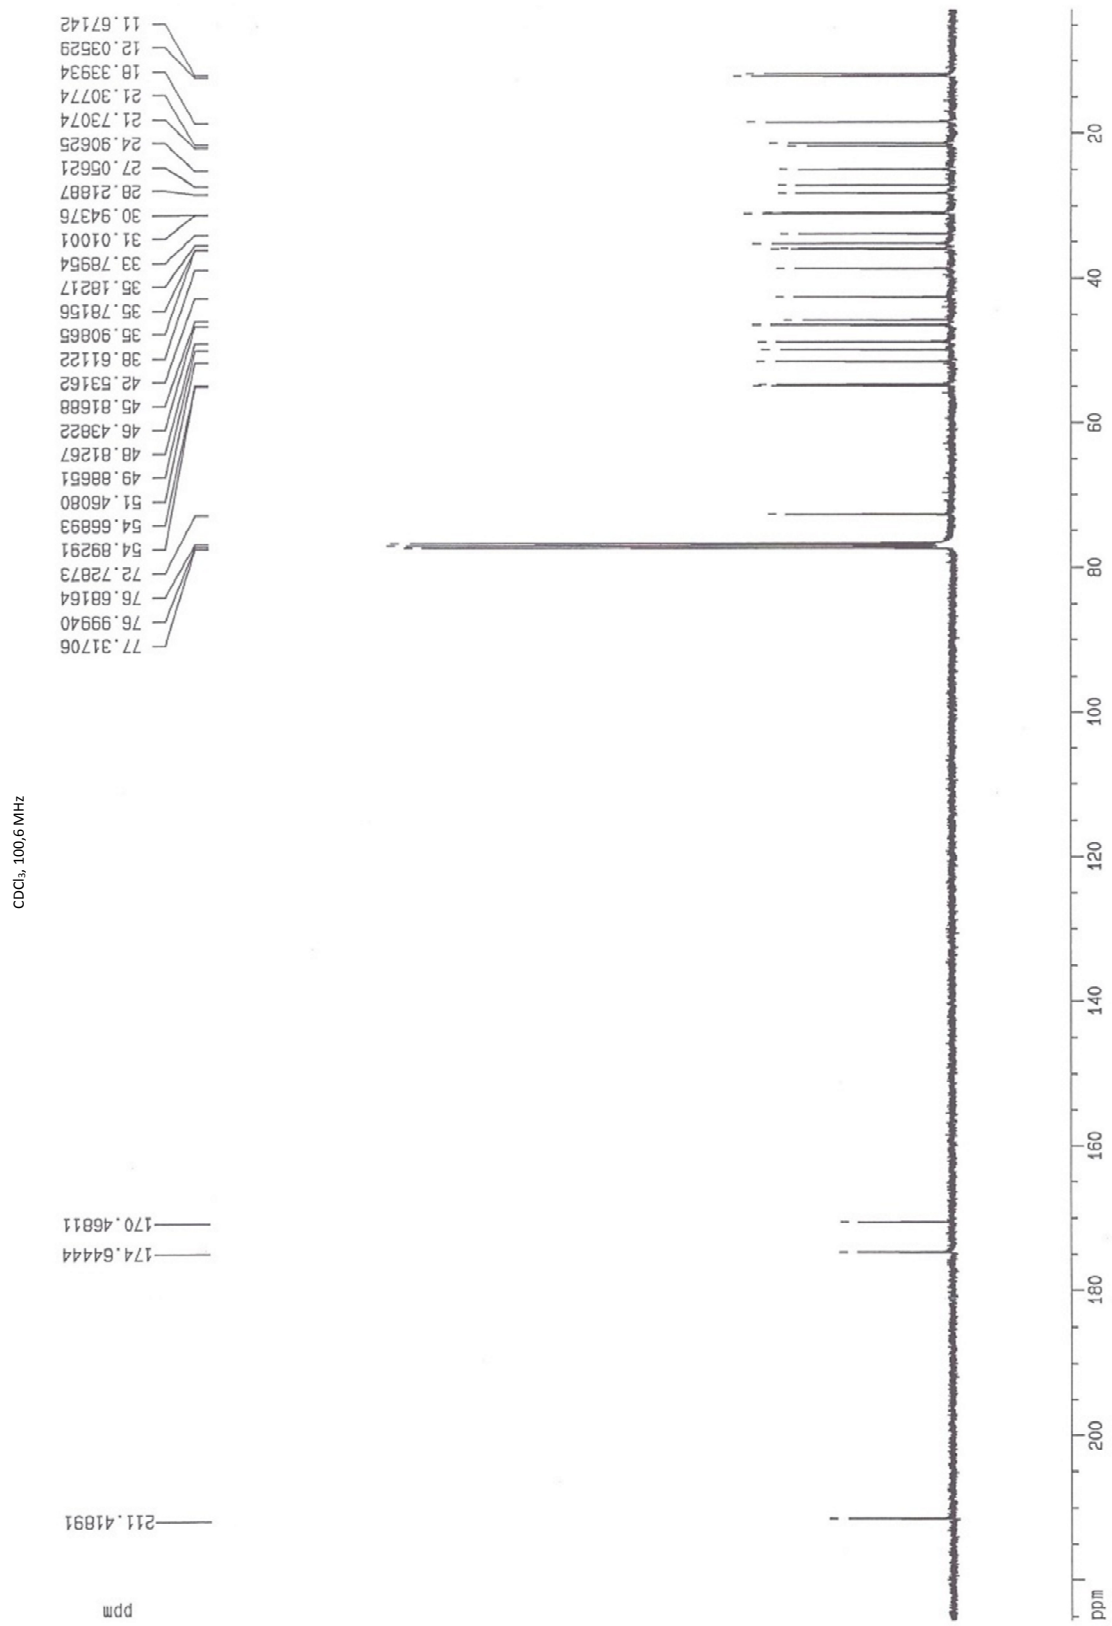

Methyl 3 $\beta$ -acetoxy-7 $\alpha$ -hydroxy-5 $\alpha$ -cholan-24-oate (14)

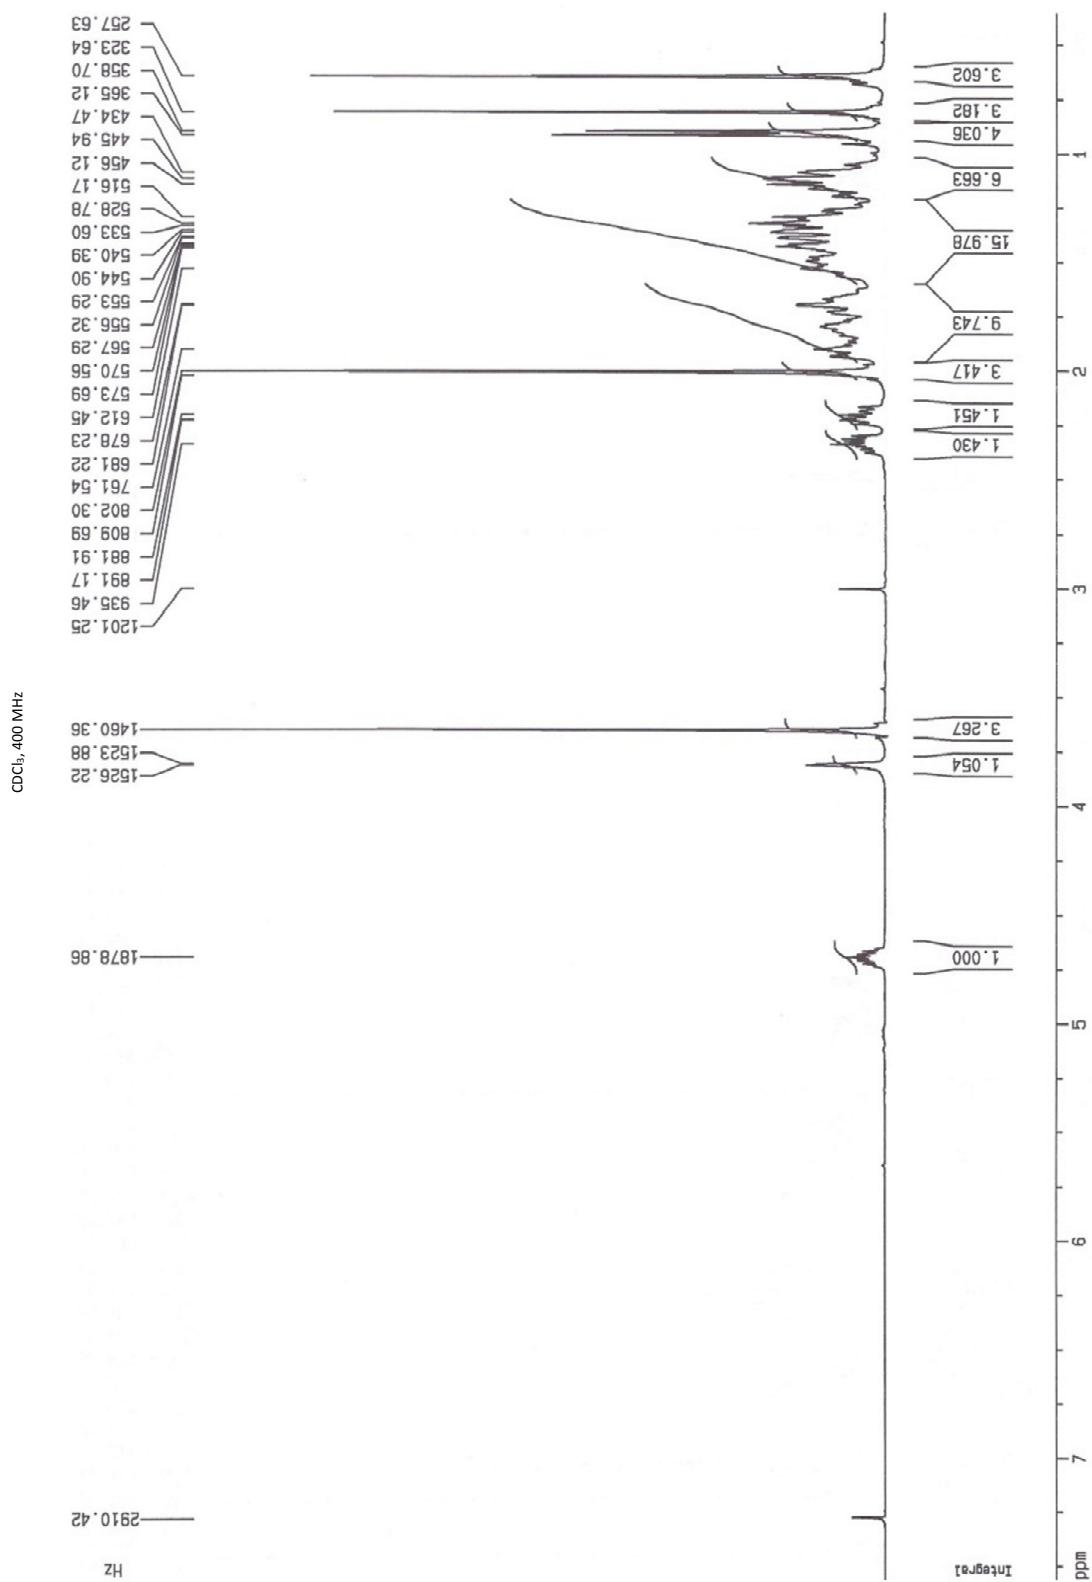

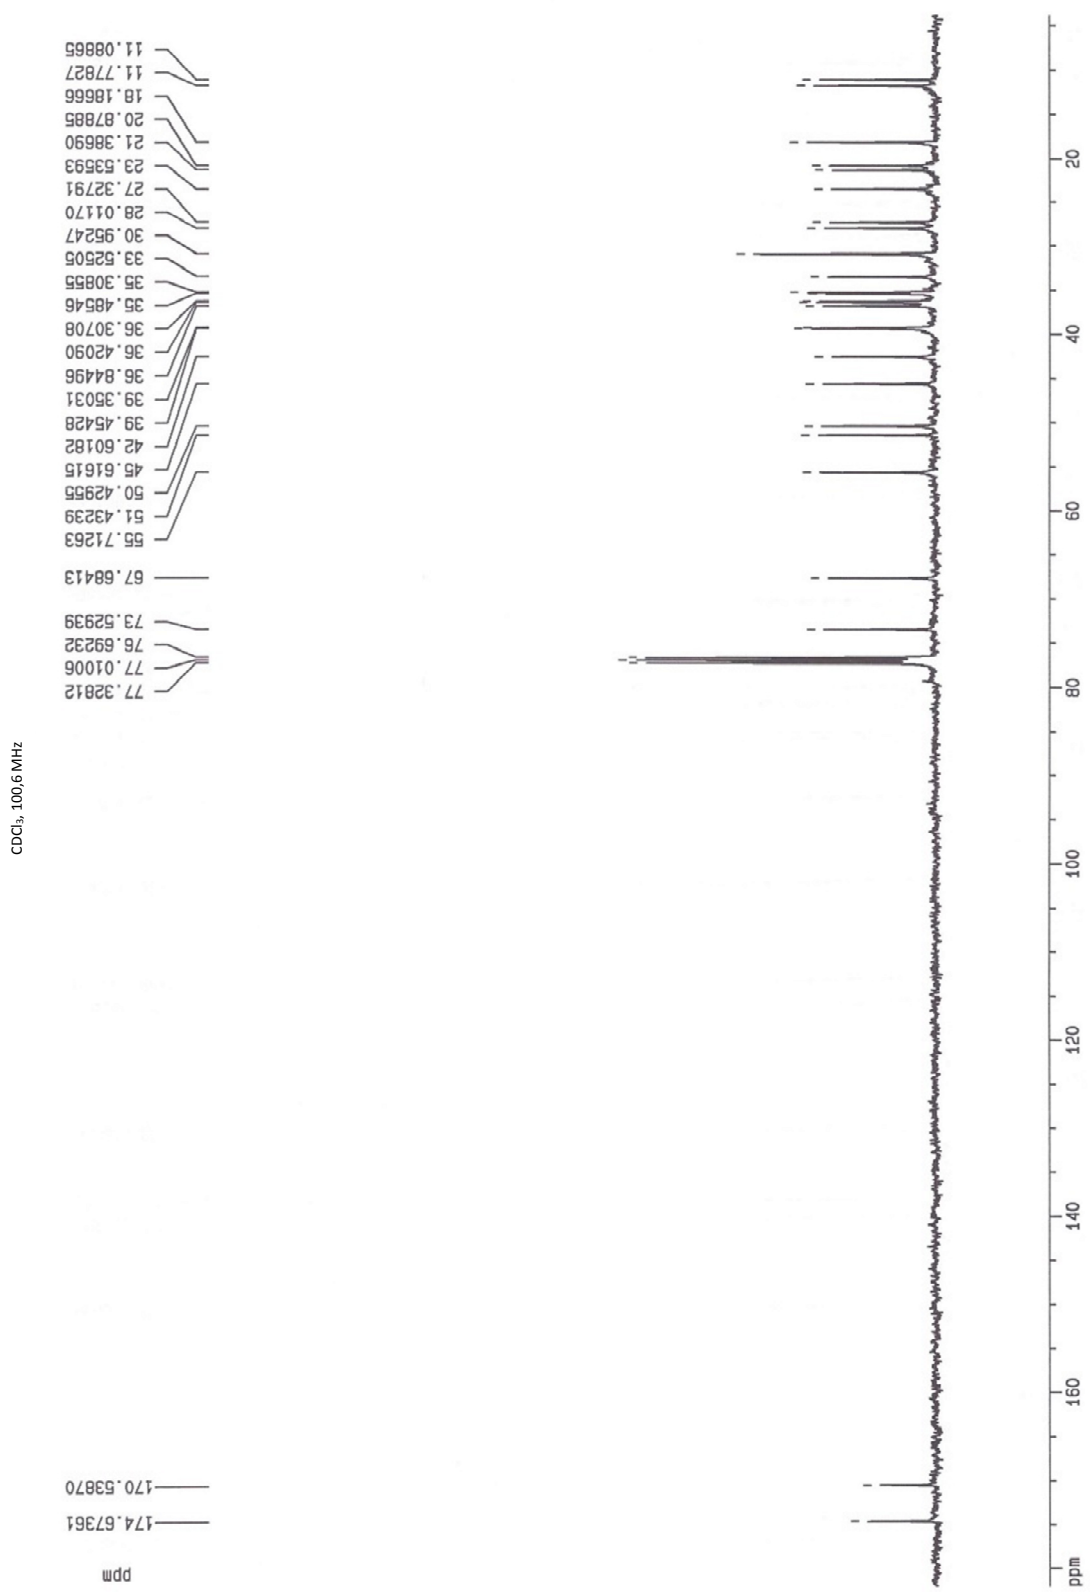

3 $\beta$ ,7 $\alpha$ -ditetrahydropyranyloxy-24-homo-5 $\alpha$ -chol-24-ene (19)

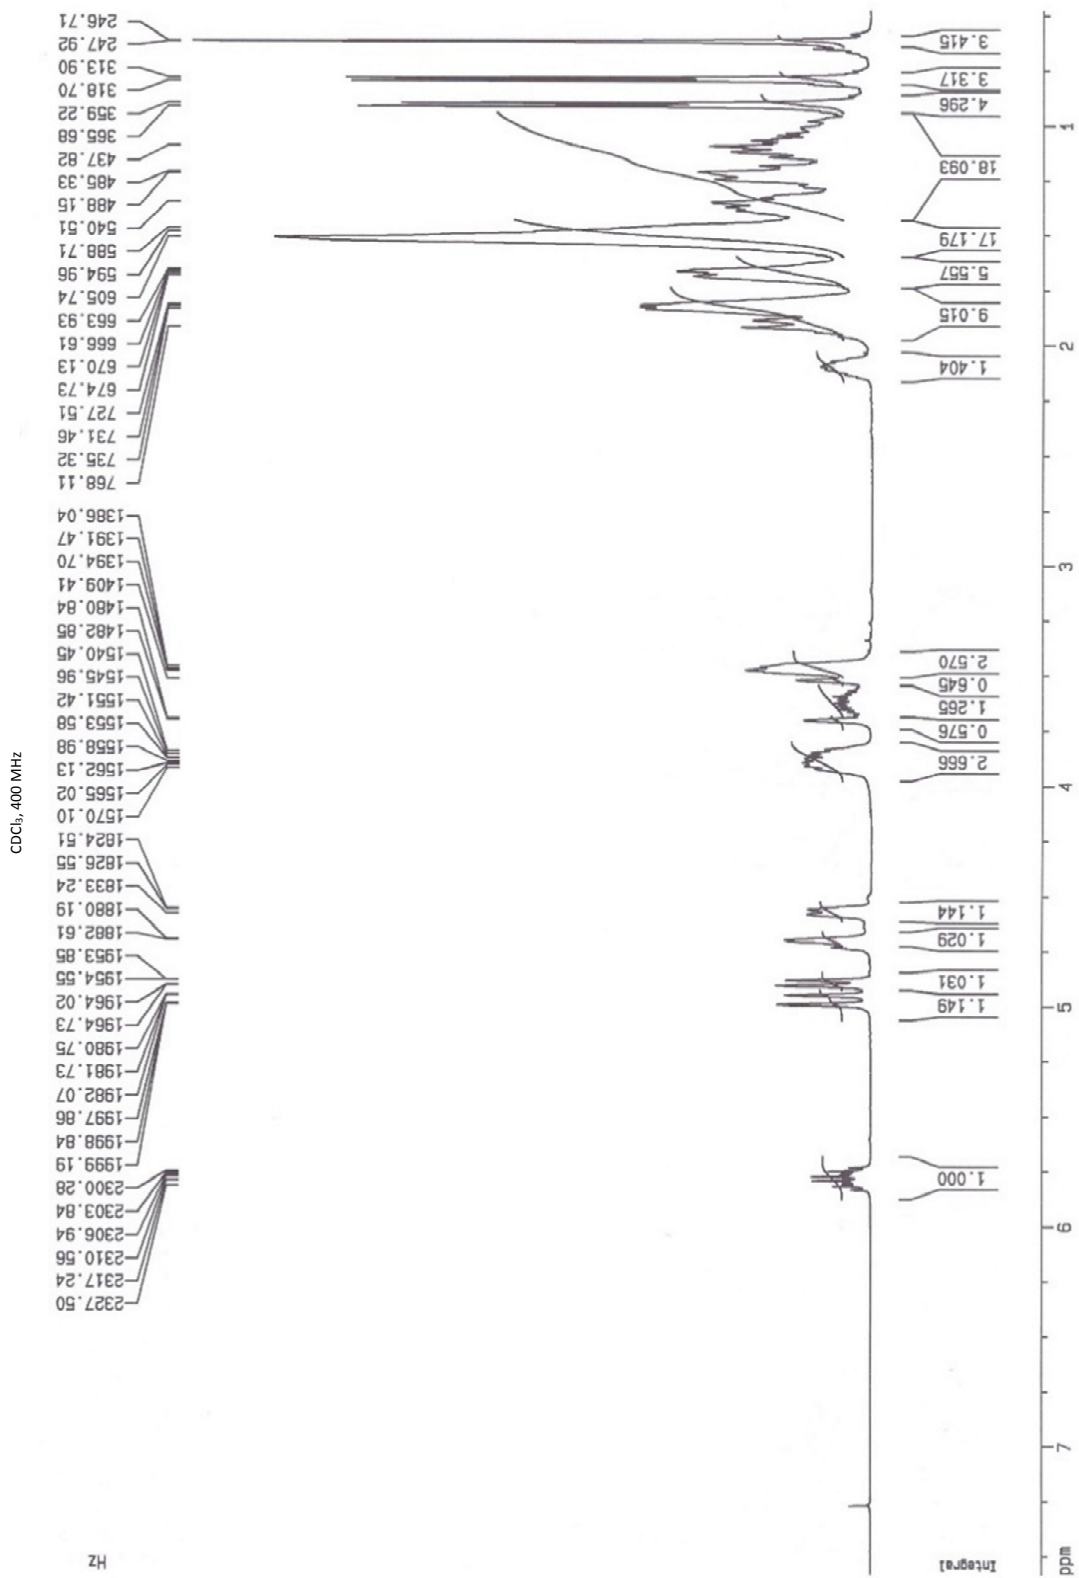

3 $\beta$ ,7 $\alpha$ -dihydroxy-24,25-methylen-24-bishomo-5 $\alpha$ -cholan-26-oic acid (20a)

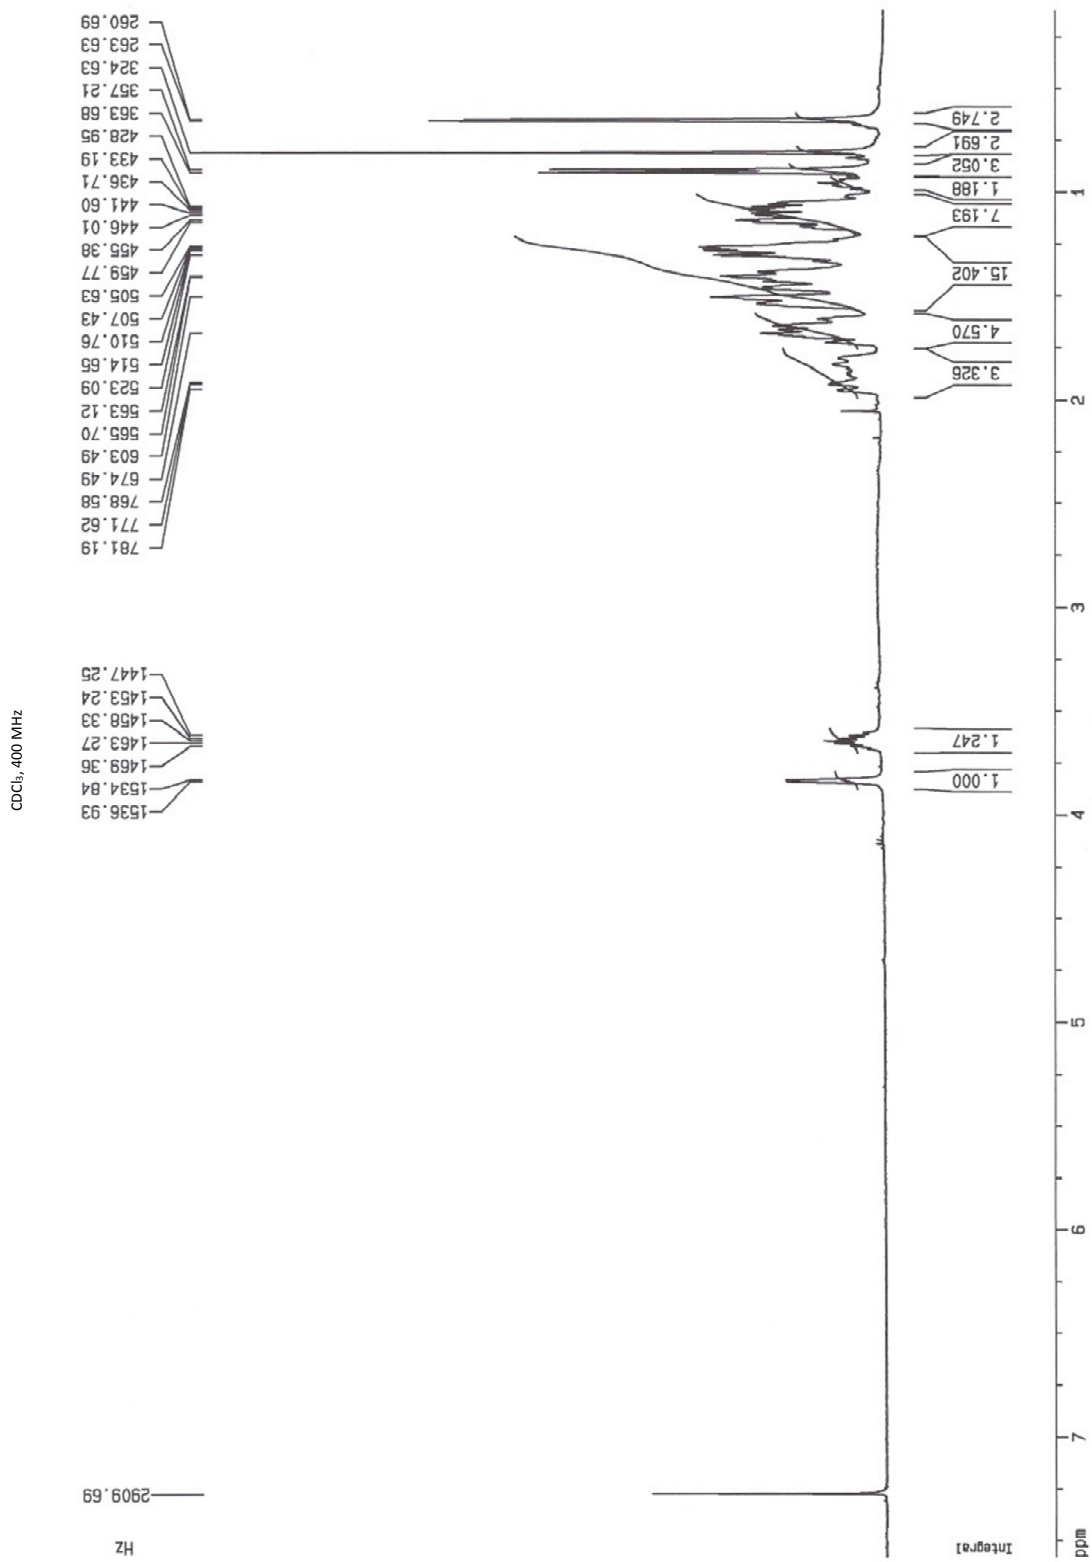



3 $\beta$ ,7 $\alpha$ -dihydroxy-24,25-methylen-24-bishomo-5 $\alpha$ -cholan-26-oic acid (20b)

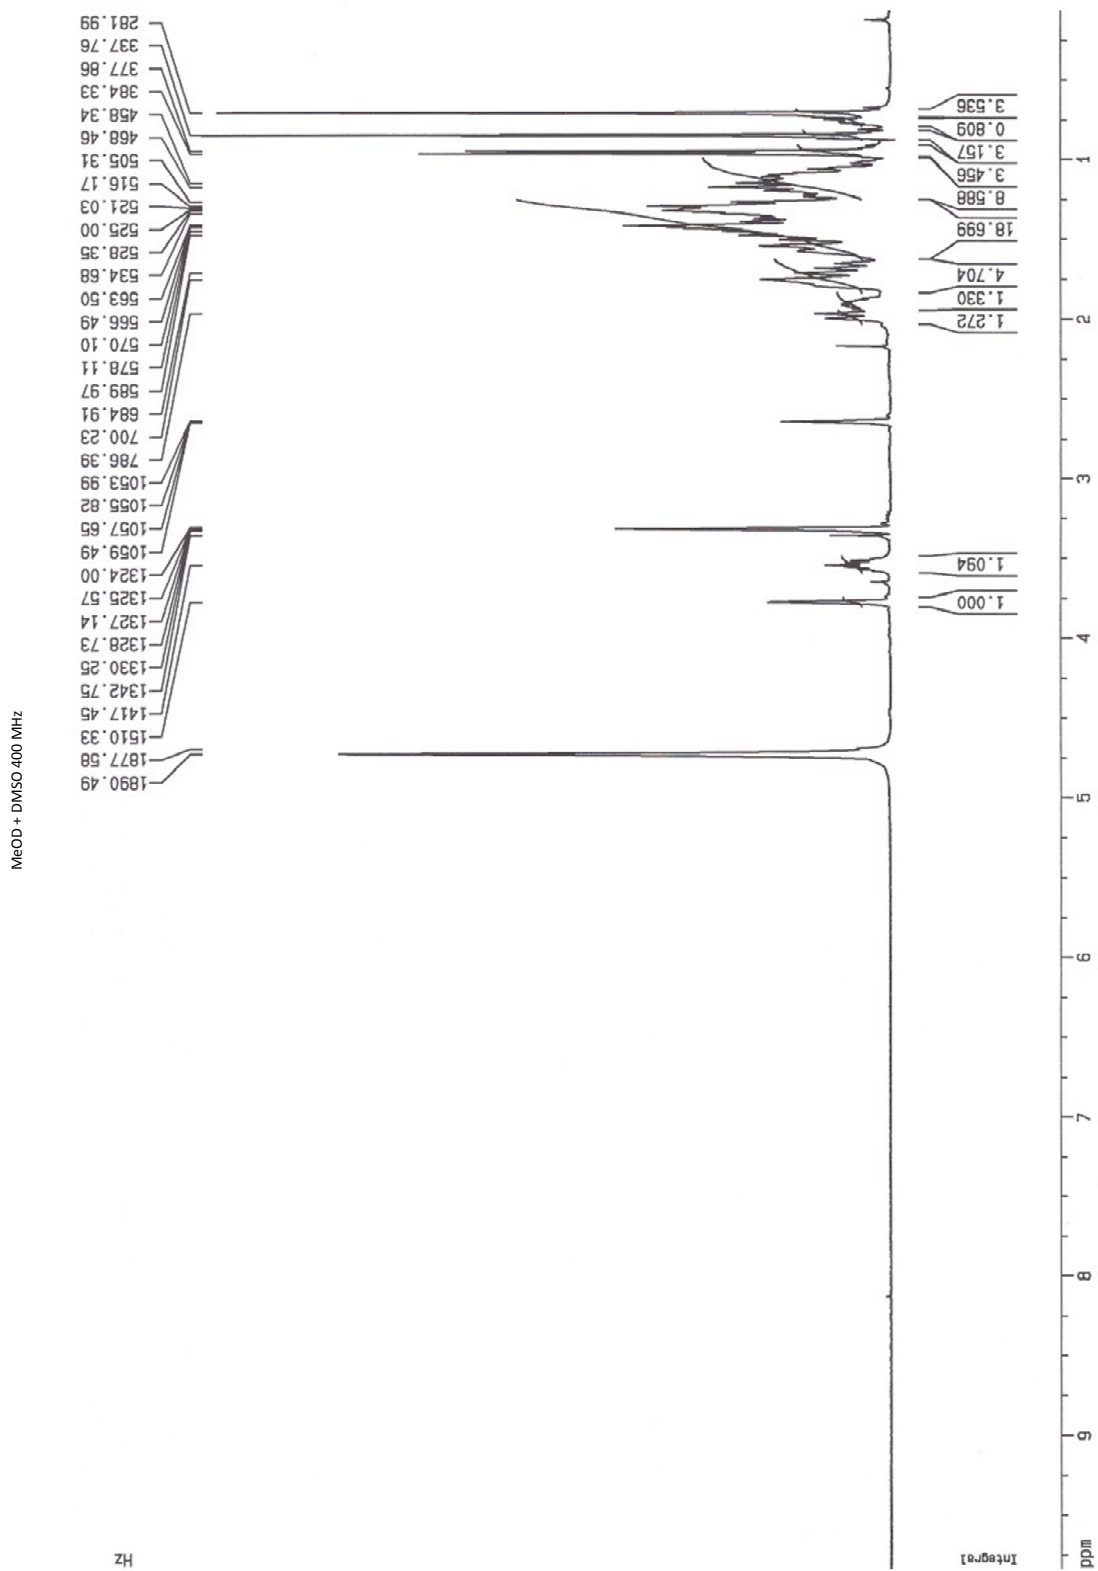

Methyl 3 $\beta$ -acetoxy-24,25-methylen-24-bishomo-5 $\alpha$ -chol-7-en-26-oate (22a)

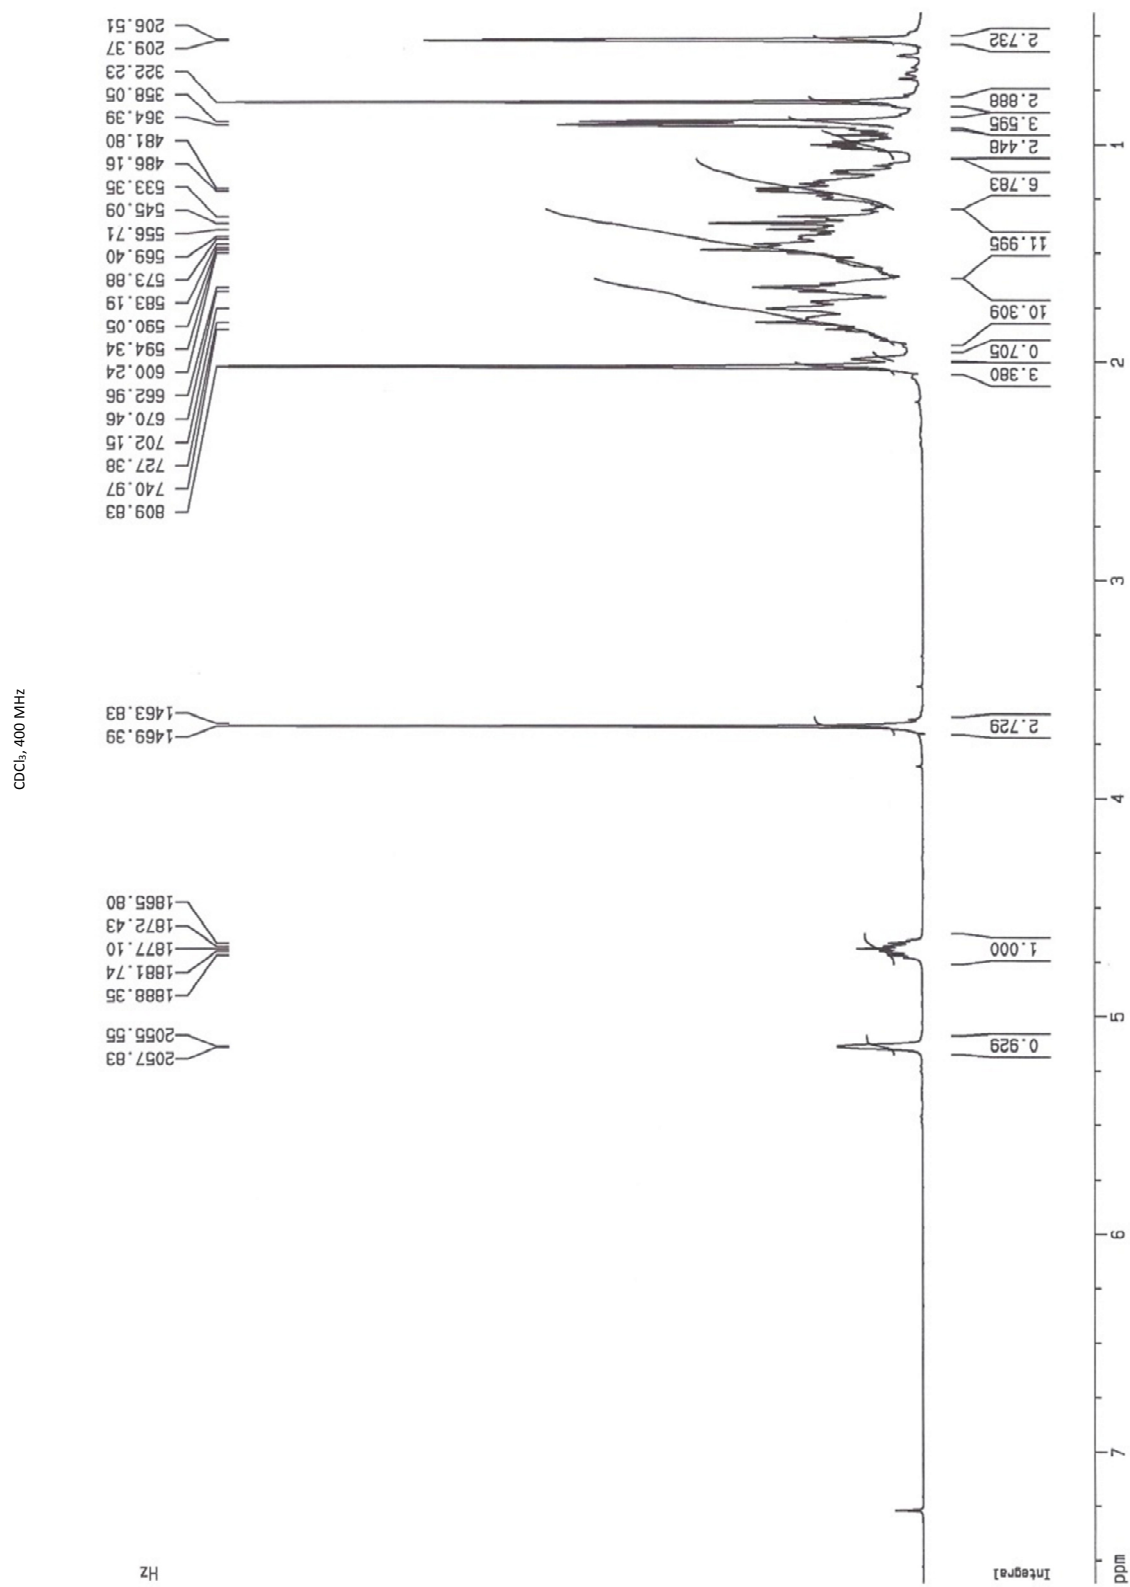

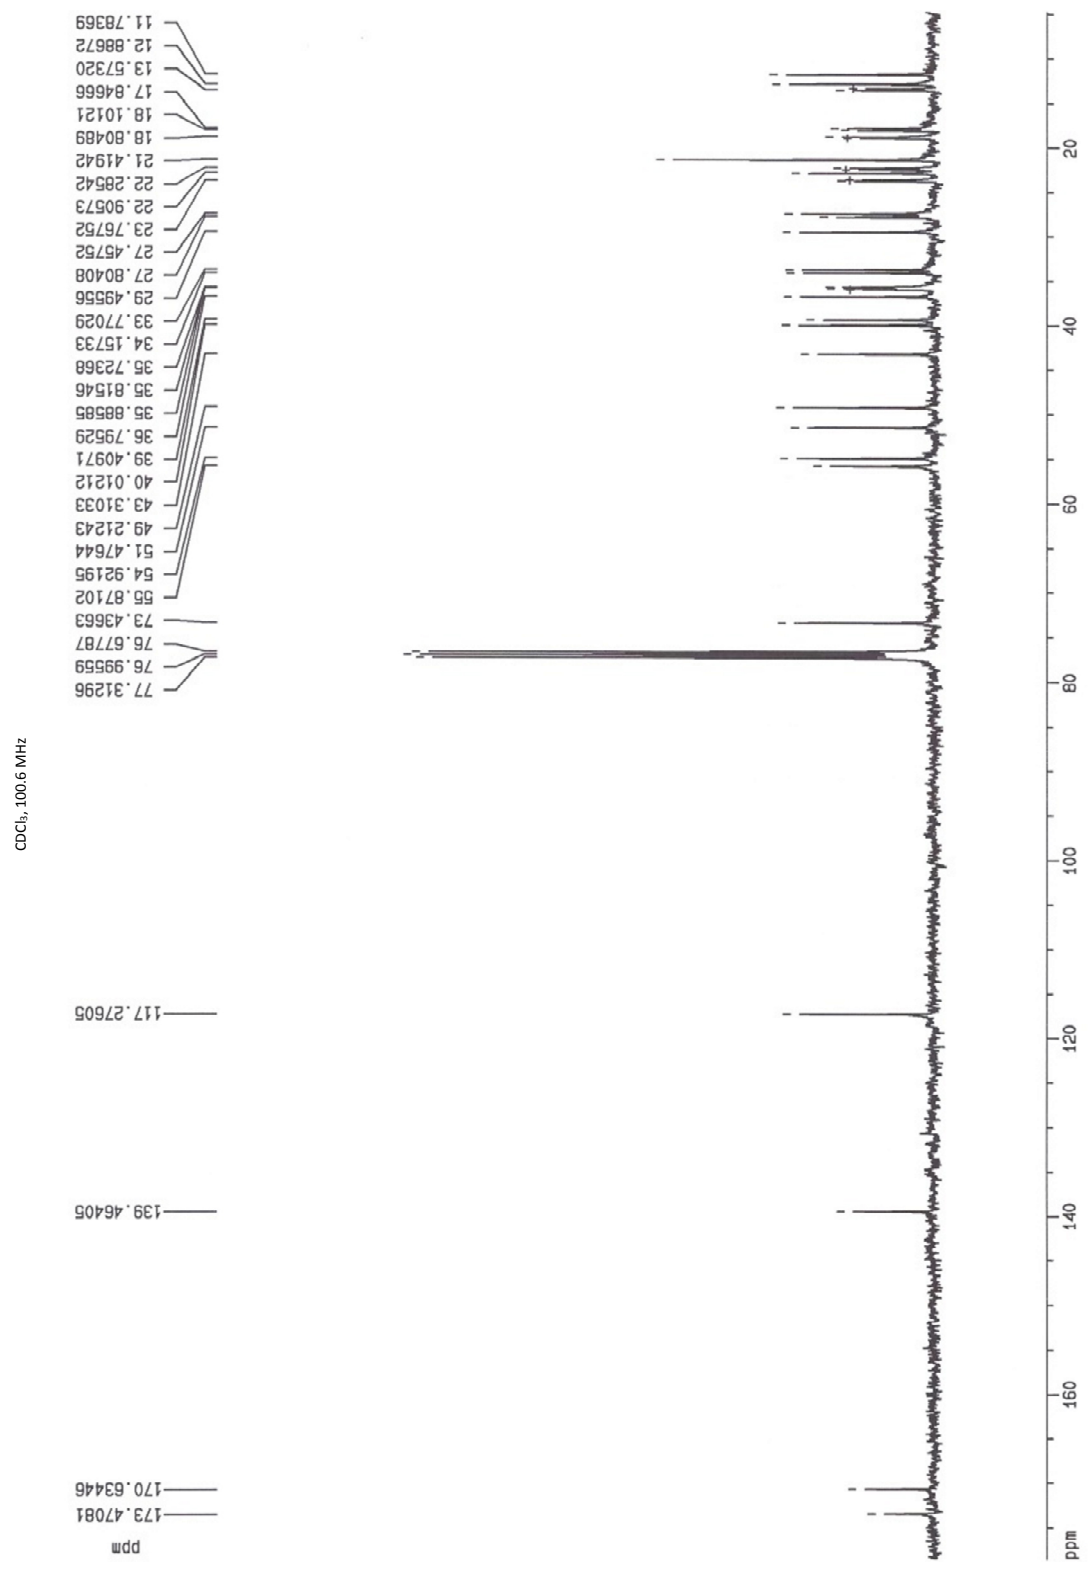

Methyl 3 $\beta$ -acetoxy-24,25-methylen-24-bishomo-5 $\alpha$ -chol-7-en-26-oate (22b)

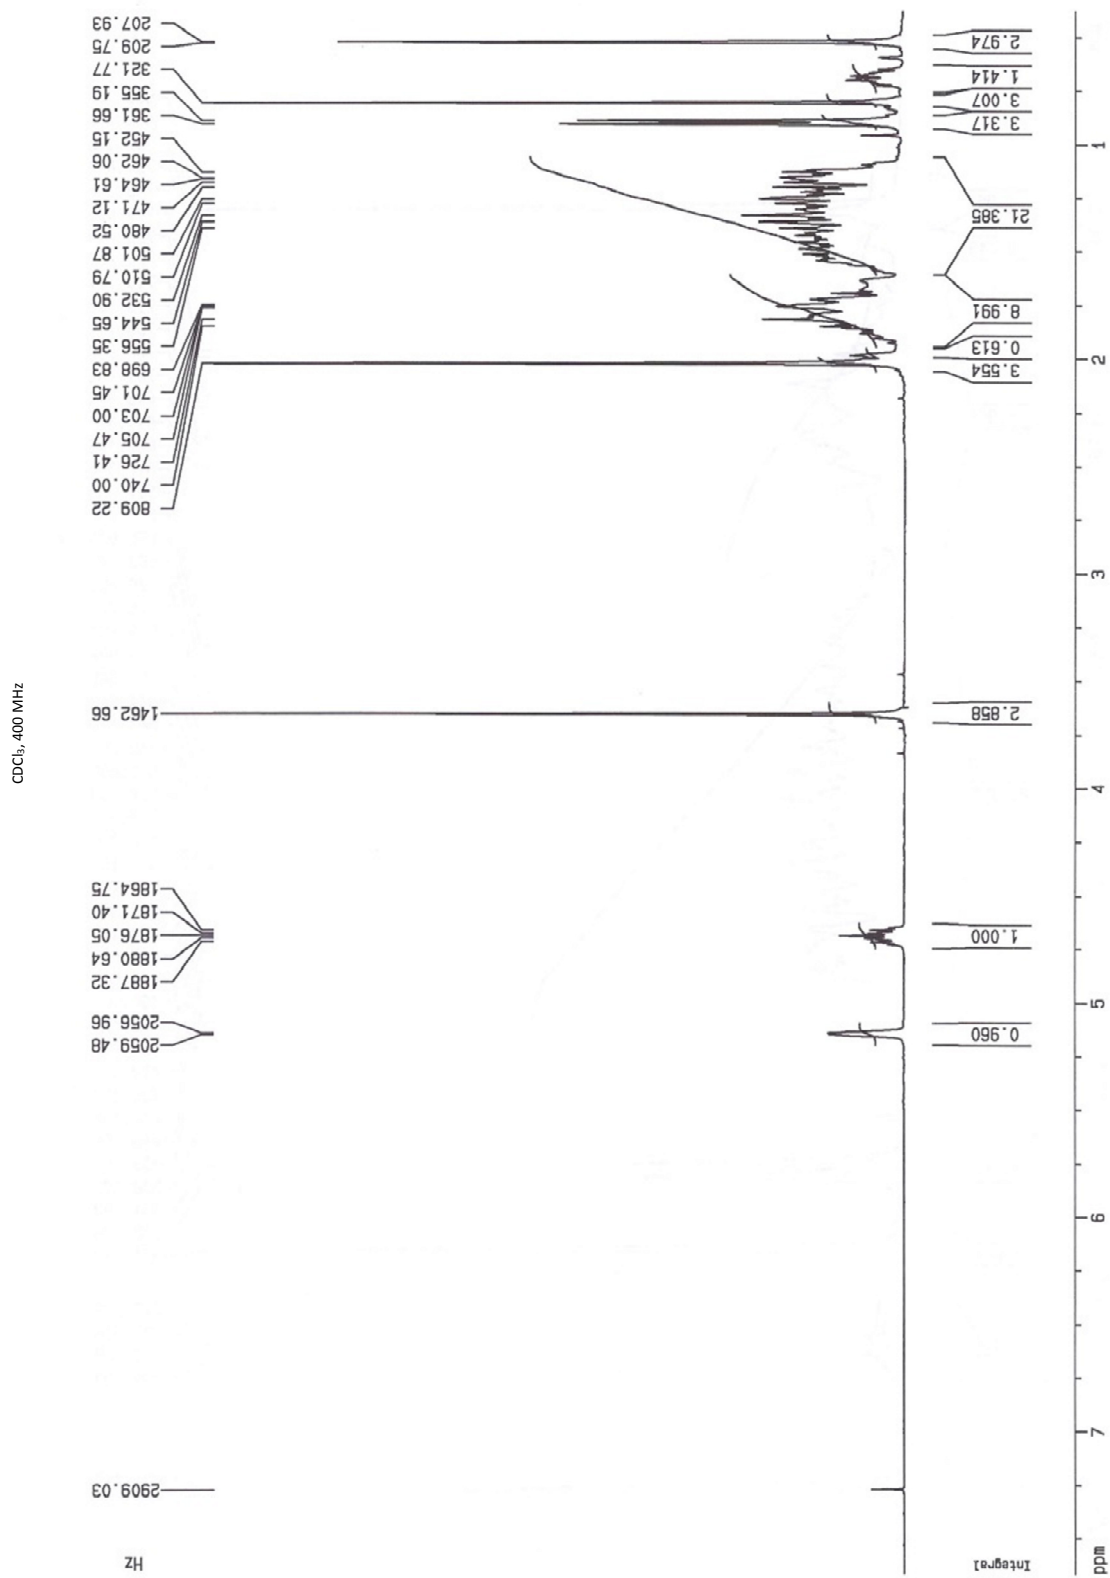

CDCl<sub>3</sub>, 100.6 MHz

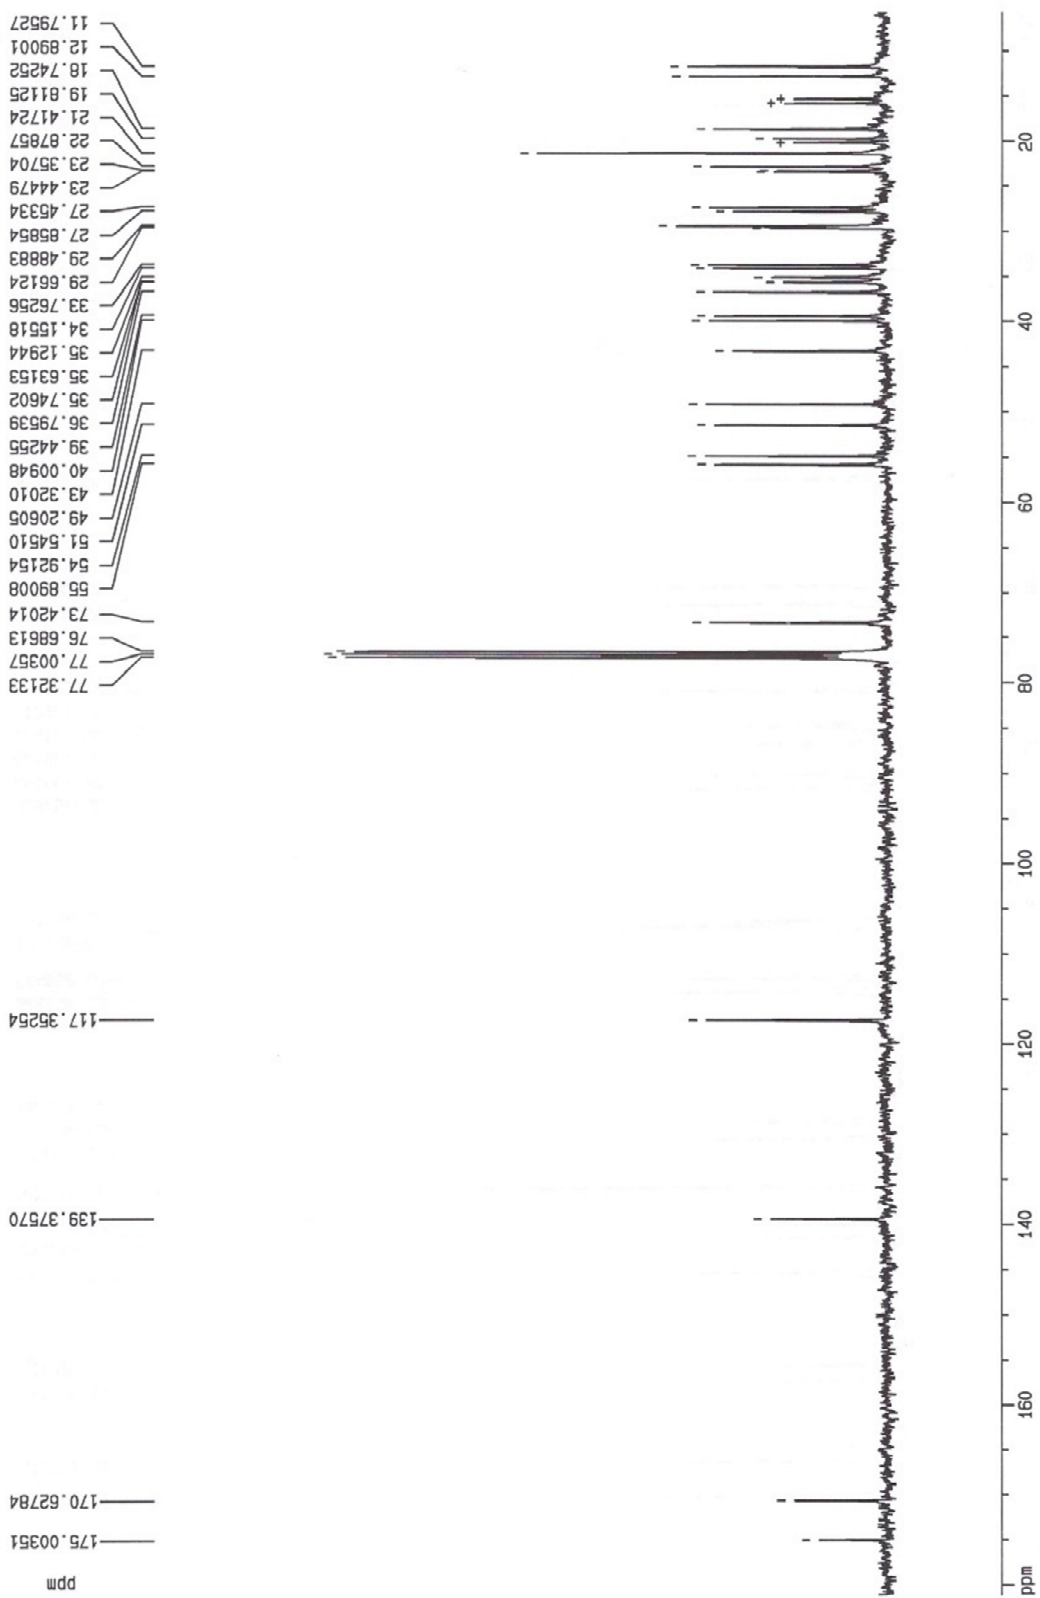

3 $\beta$ -hydroxy-24,25-methylen-24-bishomo-5 $\alpha$ -chol-7-en-26-oic acid (23a)

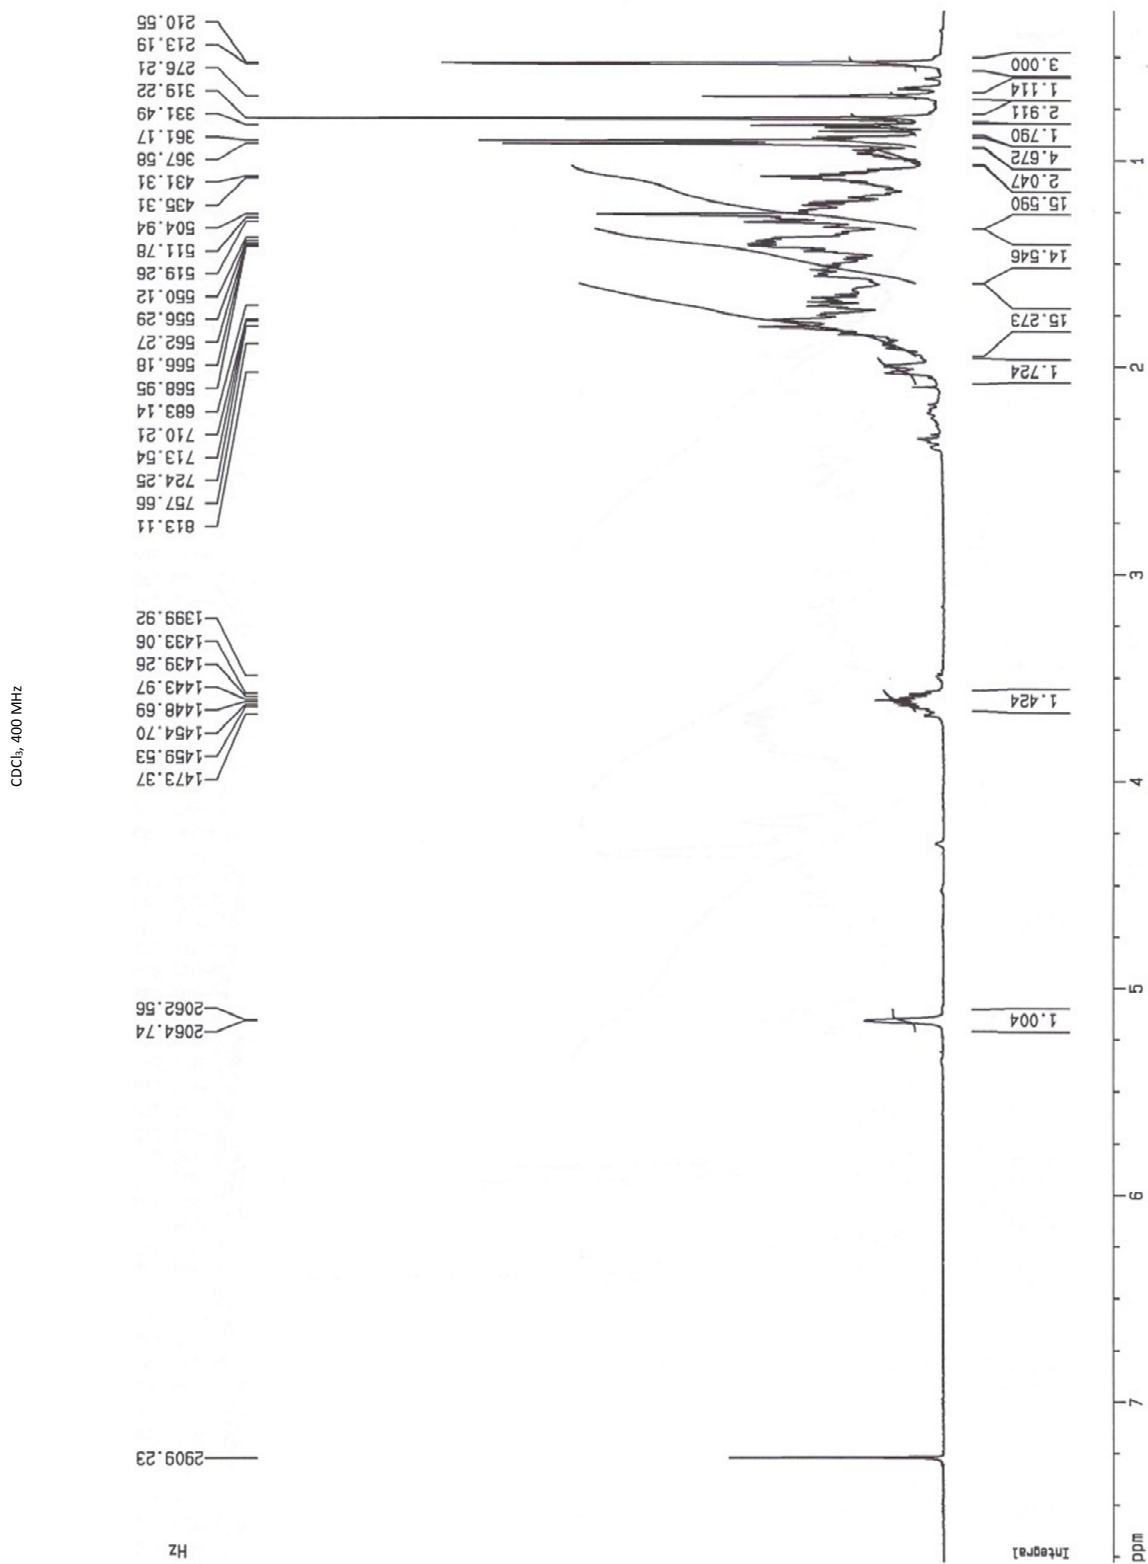

CDCl<sub>3</sub>, 100.6 MHz

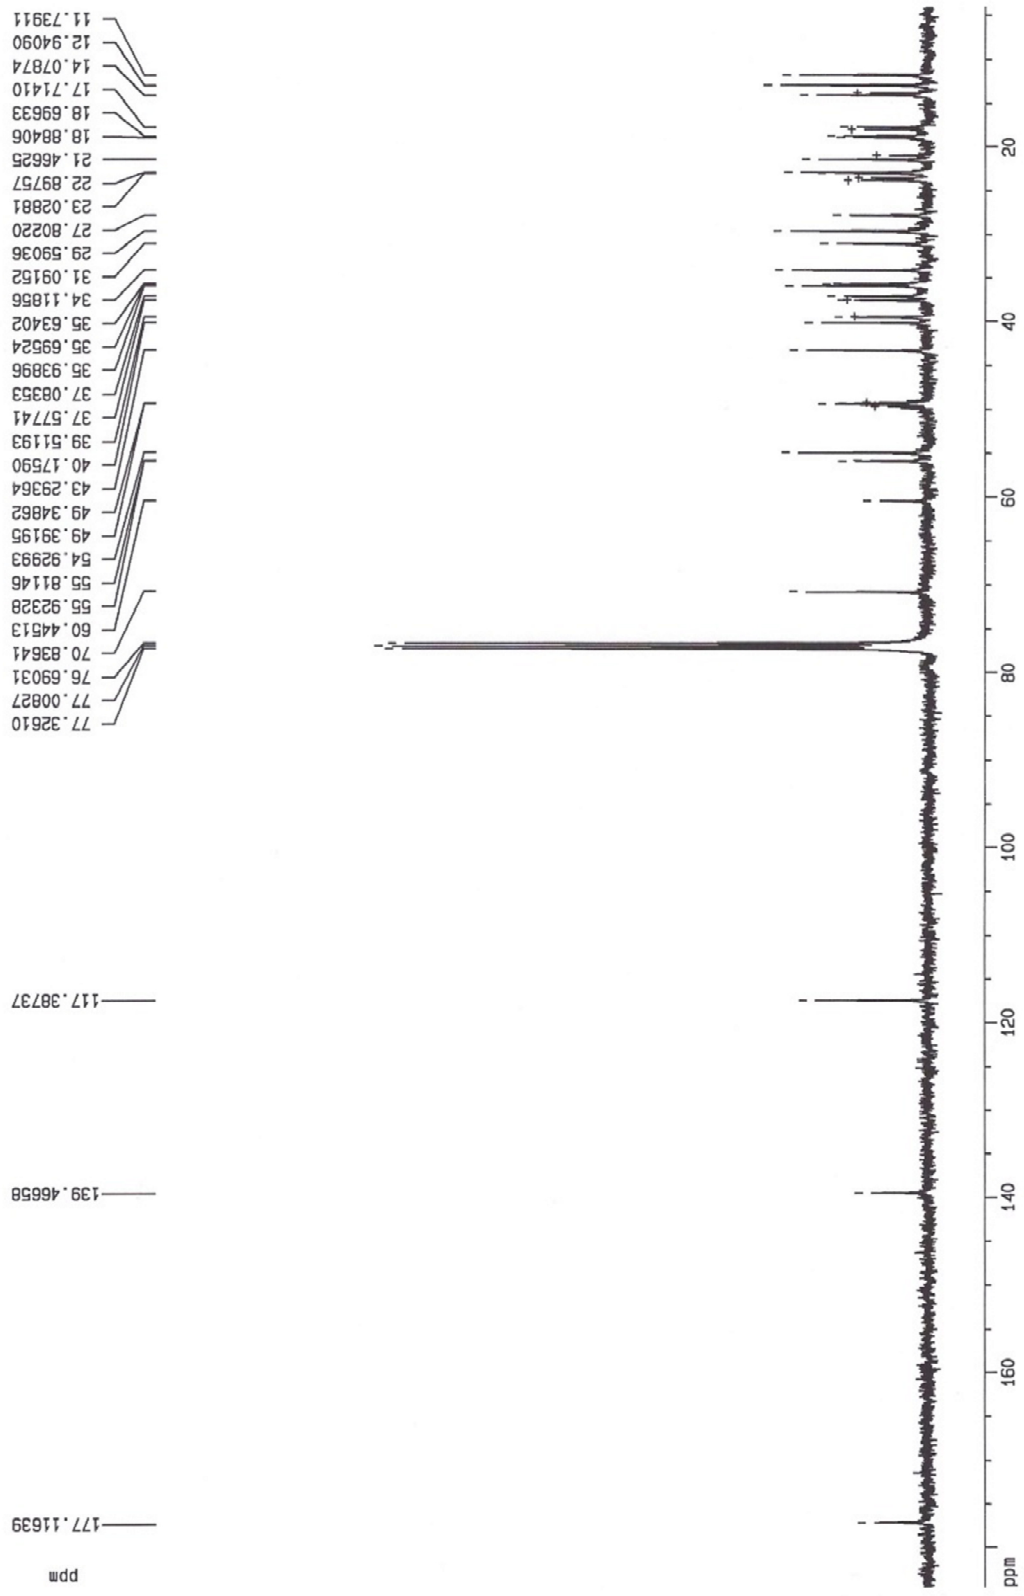

3 $\beta$ -hydroxy-24,25-methylen-24-bishomo-5 $\alpha$ -chol-7-en-26-oic acid (23b)

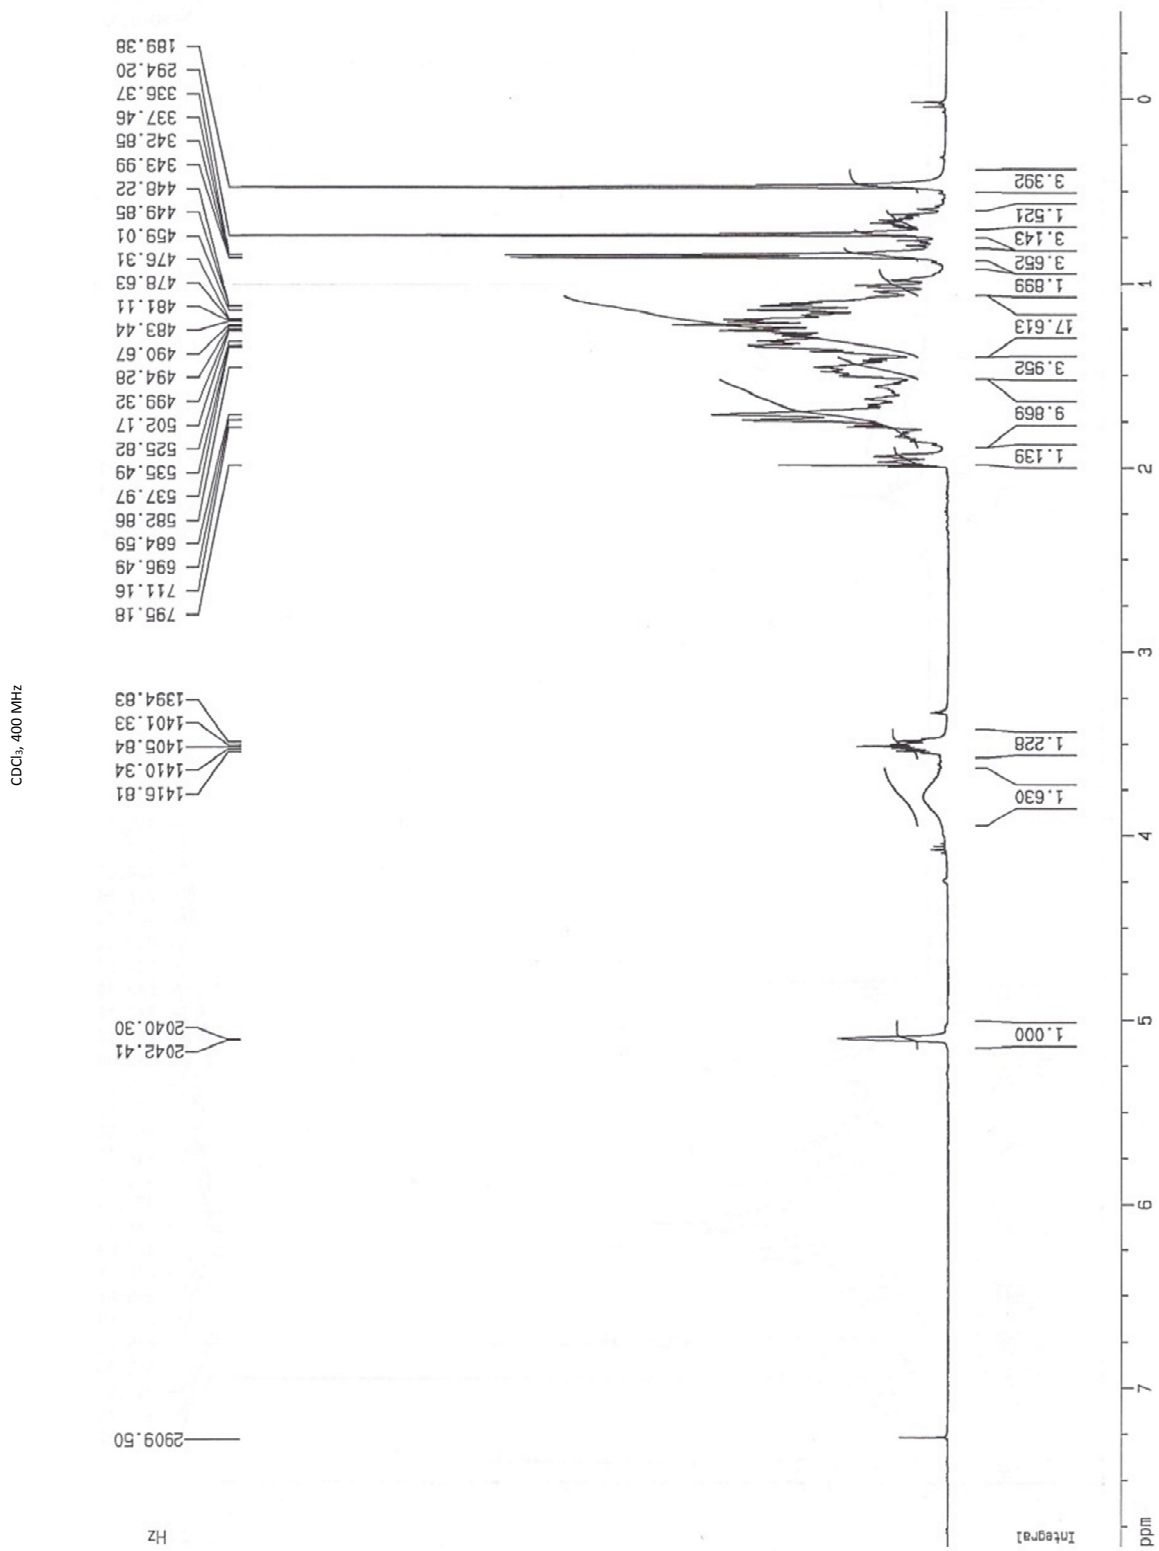



CDCl<sub>3</sub>, 100.6 MHz

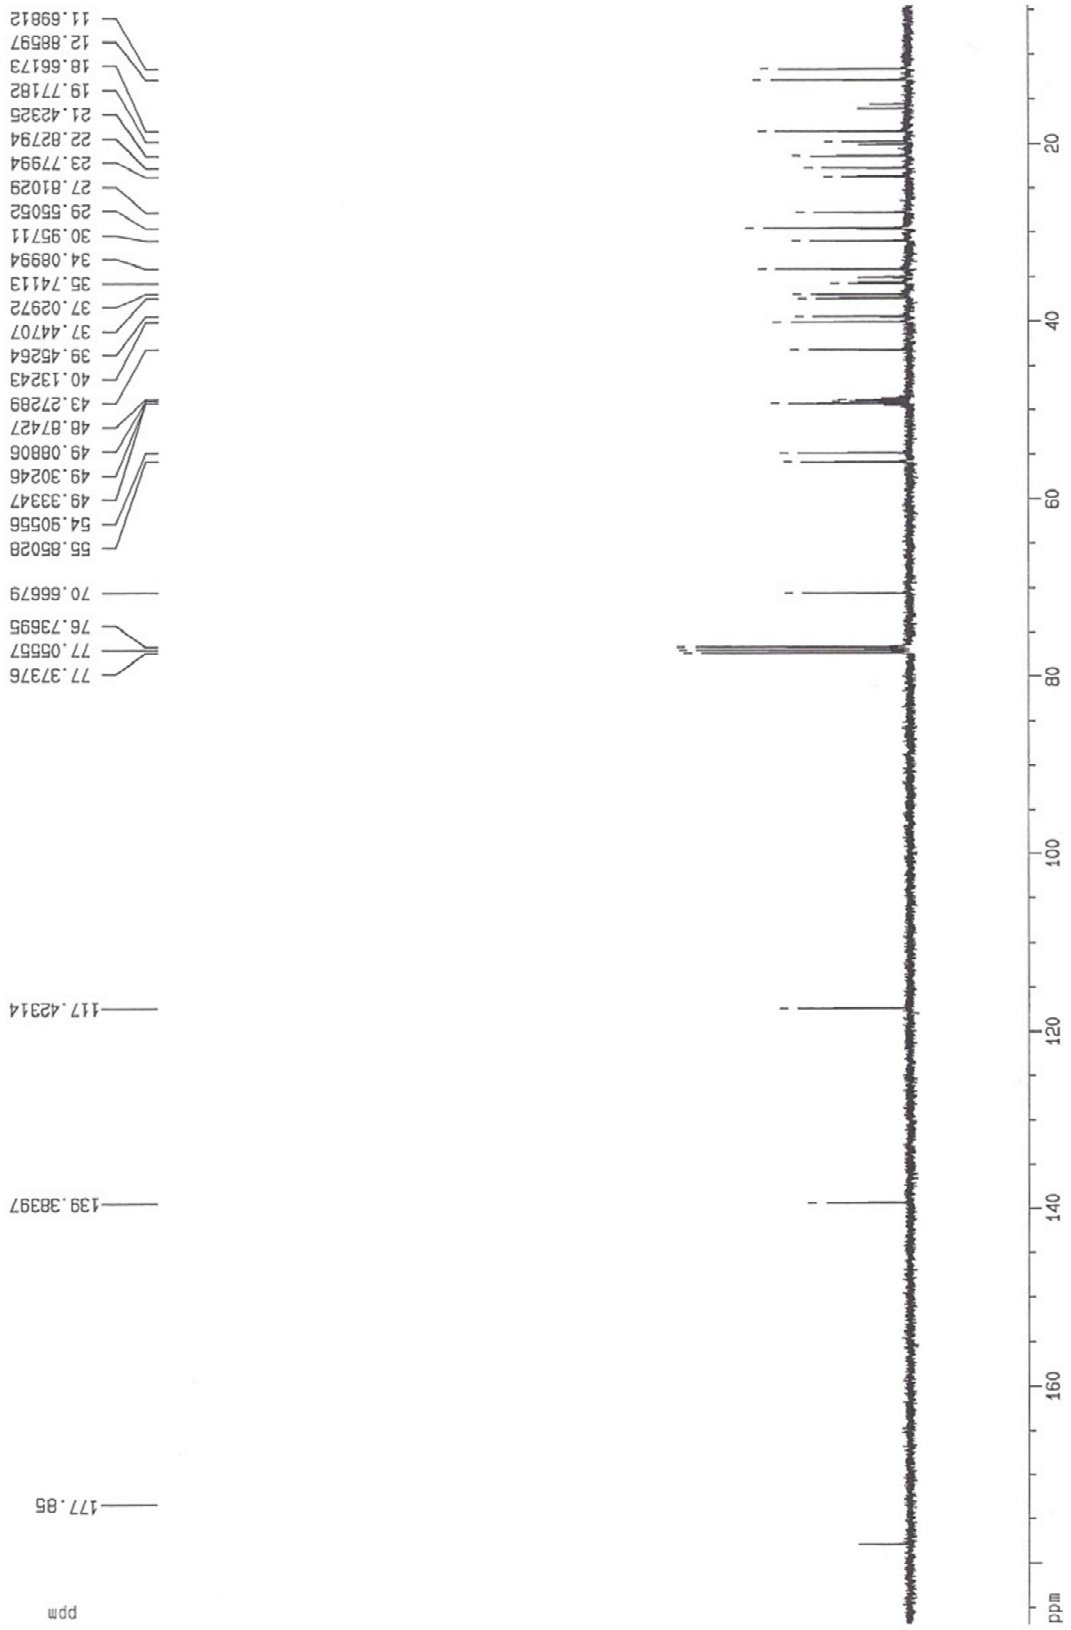

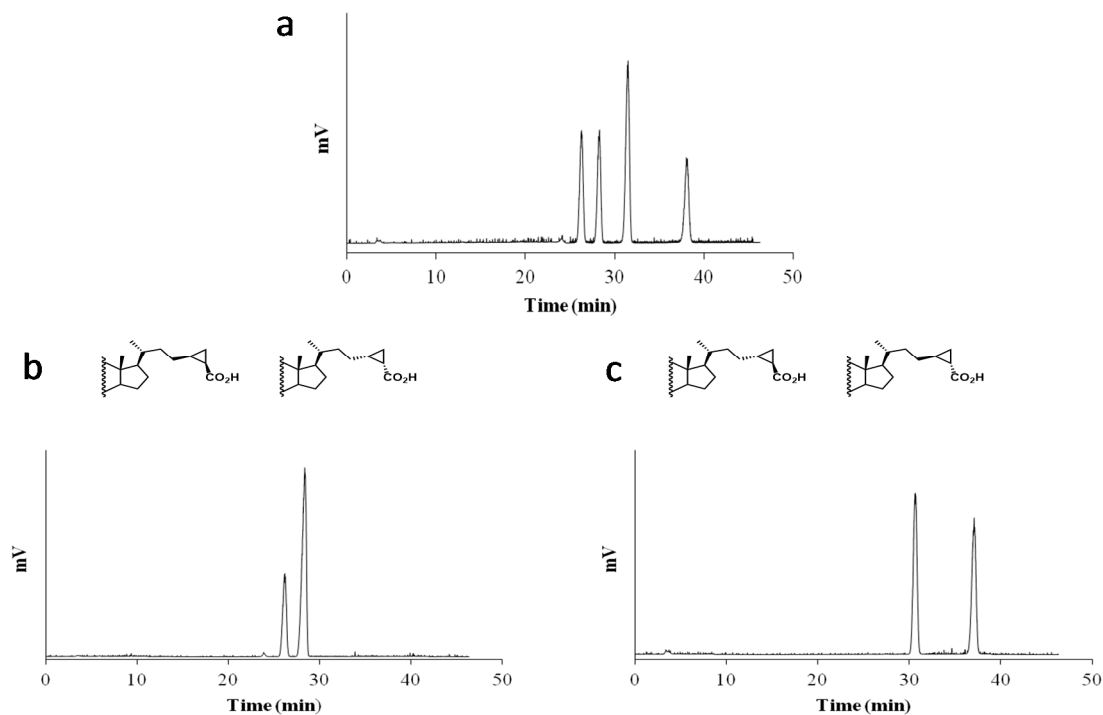

**Fig. 1S** a) HPLC analysis of isomeric mixture of 3 $\beta$ ,7 $\alpha$ -dihydroxy-24,25-methylen-24-bishomo-5 $\alpha$ -cholan-26-oic acid (**20a,b**). b) HPLC analysis of *cisoids* **20a** c) HPLC analysis of *transoids* **20b**. *Analysis conditions*: column Grace Smart RP18 (Grace, Lokeren, Belgium) (250 mm x 4.6 mm I.D., 5 $\mu$ m), column temperature 25  $^{\circ}$ C, eluent H<sub>2</sub>O/CH<sub>3</sub>CN/MeOH 50:40:10 (v/v/v) + NH<sub>4</sub>HCOO 40 mM, pH= 3.5 (this is actually the so-called “apparent pH” of the overall ternary mixture), flow rate= 0.7 mL/min, detector ELSD (T<sub>vap</sub> = 50  $^{\circ}$ C, T<sub>neb</sub> = 30  $^{\circ}$ C, gas flow rate = 1.5 L/min).

| Compound Label    | <i>m/z</i> | RT    | Algorithm       | Mass      |
|-------------------|------------|-------|-----------------|-----------|
| Cpd 1: C27 H40 O3 | 411.29035  | 8.983 | Find By Formula | 412.29762 |

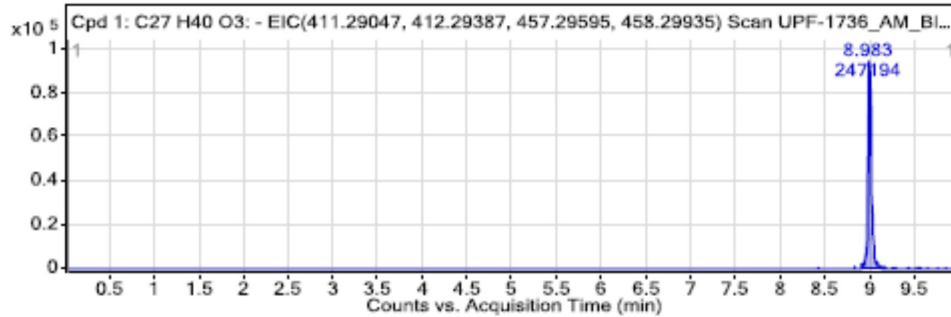

#### MS Spectrum

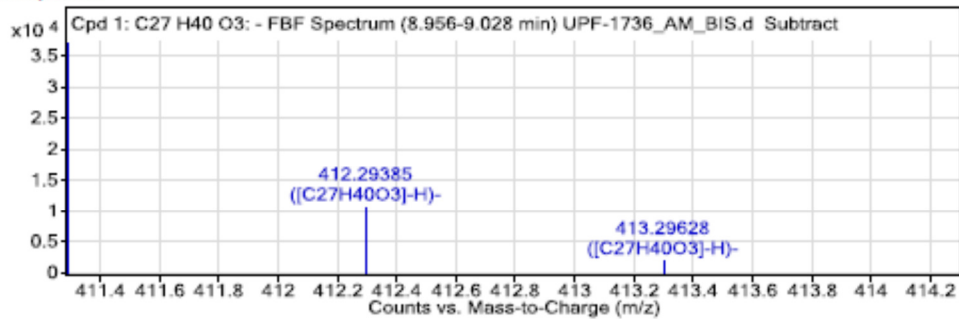

#### MS Zoomed Spectrum

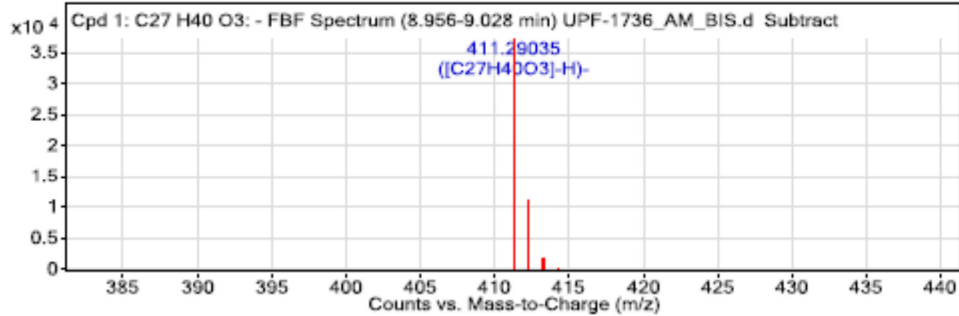

#### MS Spectrum Peak List

| <i>m/z</i> | <i>z</i> | Abund    | Formula  | Ion    |
|------------|----------|----------|----------|--------|
| 411.29035  | 1        | 37222.9  | C27H40O3 | (M-H)- |
| 412.29385  | 1        | 10883.66 | C27H40O3 | (M-H)- |
| 413.29628  | 1        | 2084.2   | C27H40O3 | (M-H)- |
| 414.29694  | 1        | 99.14    | C27H40O3 | (M-H)- |
